1 **Blood-derived DNA methylation clusters associate with adverse social exposures and**  
2 **endophenotypes of stress-related psychiatric illness in a trauma-exposed cohort of women**  
3  
4

5 **Authors:**

6 JR Pfeiffer<sup>1,2</sup>, Sanne J.H. van Rooij<sup>3</sup>, Yara Mekawi<sup>4</sup>, Negar Fani<sup>3</sup>, Tanja Jovanovic<sup>5</sup>, Vasiliki Michopoulos<sup>3</sup>,  
7 Alicia K. Smith<sup>3,6</sup>, Jennifer S. Stevens<sup>3</sup>, Monica Uddin<sup>7</sup>  
8

9 **Affiliations:**

- 10 1. Department of Psychology, University of Illinois at Urbana-Champaign, Urbana, IL, USA  
11 2. Carl R. Woese Institute for Genomic Biology, Urbana, IL, USA  
12 3. Department of Psychiatry and Behavioral Sciences, Emory University School of Medicine, Atlanta, GA  
13 4. University of Louisville, Department of Psychological and Brain Sciences, Louisville, KY  
14 5. Department of Psychiatry and Behavioral Neurosciences, Wayne State University, Detroit, MI  
15 6. Department of Gynecology and Obstetrics, Emory University School of Medicine, Atlanta, GA  
16 7. Genomics Program, College of Public Health, University of South Florida, Tampa, FL, USA  
17  
18

19 **Keywords:**

20 Peripheral epigenetics, neuroimaging, adverse social environment, biological embedding, trauma  
21

22 **Corresponding author:**

23 Address correspondence to:

24 Monica Uddin, PhD

25 University of South Florida

26 3720 Spectrum Blvd., Suite 304

27 813-974-9765

28 monica43@usf.edu  
29

30 **Manuscript details:**

31 Words in abstract: 349

32 Words in text: 6846

33 Number of references: 127

34 Number of figures: 3

35 Number of tables: 4  
36  
37  
38  
39  
40  
41  
42  
43  
44  
45  
46  
47  
48  
49  
50  
51  
52  
53  
54  
55

56 **Abstract**

57 Adverse social exposures (ASEs) such as low income, low educational attainment, and  
58 childhood/adult trauma exposure are associated with variability in brain region measurements of grey  
59 matter volume (GMV), surface area (SA), and cortical thickness (CT). These CNS morphometries are  
60 associated with stress-related psychiatric illnesses and represent endophenotypes of stress-related  
61 psychiatric illness development. Epigenetic mechanisms, such as 5-methyl-cytosine (5mC), may contribute  
62 to the biological embedding of the environment but are understudied and not well understood. How 5mC  
63 relates to CNS endophenotypes of psychiatric illness is also unclear.

64 In 97 female, African American, trauma-exposed participants from the Grady Trauma Project, we  
65 examined the associations of childhood trauma burden (CTQ), adult trauma burden, low income and low  
66 education with blood-derived 5mC clusters and variability in brain region measurements in the amygdala,  
67 hippocampus and frontal cortex subregions. To elucidate whether peripheral 5mC indexes CNS  
68 endophenotypes of psychiatric illness, we tested whether 73 brain/blood correlated 5mC clusters, defined  
69 by networks of correlated 5mC probes measured on Illumina's HumanMethylation Epic Beadchip, mediated  
70 the relationship between ASEs and brain measurements.

71 CTQ was negatively associated with rostral middle frontal gyrus (RMFG) SA ( $\beta = - 0.231$ ,  $p =$   
72  $0.041$ ). Low income and low education were also associated with SA or CT in a number of brain regions.  
73 Seven 5mC clusters were associated with CTQ ( $p_{\min} = 0.002$ ), two with low education ( $p_{\min} = 0.010$ ), and  
74 three with low income ( $p_{\min} = 0.007$ ). Two clusters fully mediated the relation between CTQ and RMFG  
75 SA, accounting for 47% and 35% of variability respectively. These clusters were enriched for probes falling  
76 in DNA regulatory regions, as well as signal transduction and immune signaling gene ontology functions.  
77 Methylome-network analyses showed enrichment of macrophage migration ( $p = 9 \times 10^{-8}$ ), T cell receptor  
78 complex ( $p = 6 \times 10^{-6}$ ), and chemokine-mediated signaling ( $p = 7 \times 10^{-4}$ ) pathway enrichment in association  
79 with CTQ.

80 Our results support prior work highlighting brain region variability associated with ASEs, while  
81 informing a peripheral inflammation-based epigenetic mechanism of biological embedding of such  
82 exposures. These findings could also serve to potentiate increased investigation of understudied  
83 populations at elevated risk for stress-related psychiatric illness development.

## 84 **Introduction**

85 Adverse social exposures (ASEs) such as low income, low educational attainment, childhood  
86 trauma, and adult trauma exposure, are common in the United States (US). Over the past five years, poverty  
87 rates in the US have ranged from 12 to 15%[1], and are likely to increase due to the impact of the COVID-  
88 19 pandemic[2]. The percentage of US adults aged 18 to 24 that finish high school with a diploma or GED  
89 is roughly 88%, meaning that over one million students per year leave high school without completion  
90 credentials[3]. Past year exposure to physical abuse in US children ranges from 4% to 16%, whereas past  
91 year psychological abuse is reported in 10% of children in the US; sexual abuse is experienced at some  
92 point during childhood in 15% to 30% of children[4]. Furthermore, in a US population-based study of 34,653  
93 participants, researchers found that depending on self-reported race/ethnicity, respondents' prevalence of  
94 lifetime trauma exposure varied between 66% and 84%[5]. Other researchers have observed a lifetime  
95 traumatic exposure prevalence ranging from 50% to 90%[6-8]. ASEs are known to have long-term impact  
96 on emotional well-being and mental health; however, the mechanistic basis for these effects remain poorly  
97 understood.

98 One particularly salient risk following ASE exposure is the development of stress-related psychiatric  
99 illness or symptoms of such illnesses. For example, in both adults and children, poverty-related stress is  
100 associated with increased internalizing symptoms (e.g., sadness or anxiety), involuntary engagement  
101 stress responses (e.g., emotional arousal or intrusive thoughts), externalizing symptoms (e.g., acts of  
102 aggression or theft), and involuntary disengagement stress responses (e.g., emotional numbing or cognitive  
103 interference) [9]. Relatedly, World Health Organization (WHO) data has shown that rates of anxiety, mood,  
104 and substance-use disorders are all positively correlated with measures of socioeconomic disadvantage,  
105 including both low income and low educational attainment [10]. Moving a step beyond correlation, a  
106 longitudinal study found that higher educational attainment significantly attenuated both the overall risk of  
107 adult onset major depressive disorder (MDD), particularly in women, and the conditional risk of MDD as  
108 well[11].

109 The effects of childhood maltreatment or trauma on long-term mental health prognoses are also  
110 well-documented. In a recent meta-analysis of over 190 studies and 68,000 participants, researchers  
111 observed that higher childhood maltreatment (including potential traumas such as emotional abuse,

112 physical abuse, sexual abuse) scores were associated with MDD diagnosis later in life and with depression  
113 symptom severity[12]. This built upon previous work showing that exposure to any form of maltreatment  
114 during childhood was associated with a two-fold risk of MDD development, and nearly a three-fold risk of  
115 generalized anxiety disorder (GAD) development in adulthood[13]. Although childhood and adolescence  
116 are regarded as particularly vulnerable periods of development, the impact of trauma on psychiatric  
117 illness/symptom development are also notable when trauma is experienced in adulthood, with effects that  
118 are known to vary by race/ethnicity and gender. A particularly salient example of this is evident in the  
119 potential development of post-traumatic stress disorder (PTSD) after trauma. Recent population-based  
120 work highlights race/ethnic differences in psychiatric illness development and PTSD in particular.  
121 Researchers found that African Americans are generally more resilient to developing psychiatric illness  
122 after a TE, compared to other races/ethnicities[14]; however, this resilience does not apply to PTSD, where  
123 African Americans experience elevated conditional PTSD development rates relative to other  
124 races/ethnicities[14]. This, in tandem with research showing that females are subject to almost double the  
125 risk of developing PTSD and other mood-anxiety disorders throughout their lifetime[6, 15-17], highlights  
126 that African American women in particular may be subject to elevated risk of stress-related psychiatric  
127 illness development.

128         A great deal of work has been placed in identifying the neural correlates of poverty, low education,  
129 and childhood/adult trauma exposure. Researchers have identified specific signatures of central nervous  
130 system (CNS) variability in association with ASEs using methods such as structural magnetic resonance  
131 imaging (MRI) and functional MRI (fMRI). In rodent [18, 19] and human [20-24] studies, observed neural  
132 correlates of ASEs include variability in volumetric, cortical thickness (CT), surface area (SA), excitability,  
133 and connectivity measures. Brain regions including frontal cortex, hippocampus, and amygdala, contribute  
134 to adaptive behavioral and emotional responses, and are relevant to psychiatric illness development due  
135 to their contributions to the generation and regulation of major decision-making, memory formation, and  
136 stress-reactivity processes [25]. To this end, a meta-analytic study showed that frontal pole (FP), superior  
137 frontal gyrus (SFG), and rostral middle frontal gyrus (RMFG) frontal cortex subregions are heavily involved  
138 in attention, working memory, cognitive flexibility, and executive reasoning [26], with added involvement of  
139 the frontal pole in introspection and longitudinal thinking [27]. The anterior cingulate cortex (ACC) is

140 regarded as a mediator of the interactions between higher level cognitive processes and emotion/stress  
141 reactivity[28], and the orbito-frontal cortex (OFC) contributes to decision making and emotional processing  
142 functions[29]. These functions are impaired in numerous mental illnesses, including but not limited to  
143 PTSD[30], MDD[31], GAD[32], bipolar disorder[33], and schizophrenia[33]. These neural correlates of  
144 ASEs are associated with the development of stress-related psychiatric illnesses and may represent neural  
145 endophenotypes of said disorders[34-36].

146           Importantly though, the effects of ASEs do not travel directly from environment to psychiatric illness.  
147 The cascade of effect, rather, travel initially through the neuroendocrine system as a response to stressful  
148 external stimuli[37], whereby cortisol signaling occurs throughout the body, engaging immune (and other)  
149 biological networks[38]. This immune network activation and responses to cortisol signaling result in neural  
150 growth, inflammation, metabolism, and stress-related pathway disruption through epigenetic and other  
151 molecular mechanisms[39, 40]. The process of DNA methylation, which commonly refers to the addition of  
152 a 5-methyl-cytosine (5mC) residue to a cytosine-phosphate-guanine (CpG) base-pair, is one such  
153 epigenetic mechanism, and is understood to enhance or reduce mRNA transcription of genes in an  
154 experience-dependent, and temporally-stable manner[41]; continued research has pointed to the  
155 importance of 5mC in this biological embedding of external stimuli[42, 43]. Because of challenges in taking  
156 epigenetic measurements from a living human brain, the primary etiologic tissue of interest in regard to  
157 psychiatric illness development, peripheral tissues such as blood or saliva serve as proxies for etiological  
158 tissue. It is well-documented that these peripheral epigenetic measures can index changes to the  
159 hypothalamic-pituitary-adrenal (HPA)-axis [44, 45], immune system [46, 47], and CNS [48-50], although the  
160 direction of effect may be discordant across tissues [49, 51]. Stress-related physiological responses and  
161 their accompanying epigenetic alterations are thought to confer the biological embedding of ASEs [52, 53],  
162 and can ultimately increase the risk of stress-related psychiatric illness [39, 54]. Peripheral epigenetic  
163 measures can also index CNS-relevant endophenotypes of psychiatric illness development, as observed  
164 in studies using neuroimaging and peripheral epigenetic measures in tandem. However, these studies have  
165 primarily utilized candidate gene approaches, investigating 5mC in the *SLC6A4* [55-57], *NR3C1* [58, 59],  
166 *FKBP5* [60], and *SKA2* [61, 62] genes, and neuroimaging measures of structure and function from the  
167 frontal cortex, hippocampus, and amygdala. Findings show that peripheral 5mC can index CNS structural

168 variability[55-62] associated with psychiatric illness development, and that locus-specific peripheral 5mC  
169 can mediate ASE-associated CNS structure variability[62].

170 To date, however, limited work has investigated the relationships among ASEs, peripheral 5mC,  
171 and CNS endophenotypes of psychiatric illness at a genome-scale. To this end, the current exploratory  
172 study applied genome-scale approaches in an all-female, African American sample from the Grady Trauma  
173 Project (GTP) to assess whether blood-derived 5mC measurements might index CNS endophenotypes of  
174 stress-related psychiatric illness. We focus specifically on the GTP because African American women may  
175 be subject to elevated risk of stress-related psychiatric illness development, but the mechanisms underlying  
176 that elevated risk are still unclear. In this study, we were specifically interested whether clusters of peripheral  
177 5mC measurements statistically mediate the relation between ASEs and fronto-limbic grey matter volume  
178 (GMV), SA, and CT measures. Based on previous work, we hypothesized that identified 5mC modules  
179 would be enriched with 5mC probes falling in genes with HPA-axis[44, 45], immune system[46, 47], and  
180 CNS-relevant [48-50] gene ontology (GO) functions.

181

## 182 **Materials and Methods**

183

### 184 *Participants*

185 The current research draws on 97 female, trauma-exposed participants. Participants were part of  
186 the GTP, a larger investigation of genetic and environmental factors that predict the response to stressful  
187 life events (SLEs) in a predominantly African American, low-income, urban population [15]. Research  
188 participants were approached in the waiting rooms of primary care clinics of a large, public hospital. After  
189 the subjects provided written informed consent, they participated in a verbal interview and gave a blood  
190 sample for genetic and epigenetic analyses. Participants in this cohort also had available demographic,  
191 psychosocial, and neuroimaging data. Exclusion criteria included intellectual disability or active psychosis.  
192 Participants provided written, informed consent for all parts of the study, and the Institutional Review Boards  
193 of Emory University and Grady Memorial Hospital approved the study procedures.

194

195

196 *Exposures of interest*

197           Income, education, adult trauma burden, and childhood trauma burden were considered exposures  
198 of interest in current analyses. *Income*: Self-reported approximate household monthly income (“household  
199 income”) was measured as part of a demographic-focused inventory. Participants indicated total household  
200 income within one of the following ranges: \$0 to \$499, \$500 to \$999, or greater than \$1000 per month.  
201 *Education*: Participants also reported educational attainment history (“education”) and were binned into one  
202 of the following categories: did not complete high school, completed high school or GED, or completed  
203 more schooling than high school. *Traumatic events inventory*: Adult trauma burden was assessed via a  
204 semi-structured interview using the Traumatic Events Inventory (TEI), a scale developed by the GTP  
205 researchers during their prior work in the Grady hospital primary care population [63]. TEI responses  
206 pertaining to childhood were excluded in favor of the Childhood Trauma Questionnaire (CTQ). In the current  
207 study, the continuous TEI score was used (“TEI”); the higher the TEI score, the more traumatic life events  
208 one encountered. *Childhood trauma questionnaire*: Childhood trauma burden was assessed using the self-  
209 report 28 question CTQ [64]. This inventory consists of five subscales, including sexual abuse, physical  
210 abuse, emotional abuse, as well as physical and emotional neglect. In the current study, the total CTQ  
211 score was used (“CTQ total”). Information regarding previous usage of exposure of interest variables in  
212 GTP studies can be found elsewhere [15, 42, 65-68].

213 *Neuroimaging* Structural MRI study procedures followed the same methods as previously described in the  
214 GTP cohort [69-72]. Structural images were acquired on a Siemens 3.0-Tesla Magnetom Trio TIM whole-  
215 body MR scanner (Siemens, Malvern, PA, USA) with a 12-channel head coil, and using a gradient-echo,  
216 T1-weighted pulse sequence (176 slices, TR = 2600 ms, TE = 3.02 ms, 1 mm<sup>3</sup> voxel size). The T1 scan  
217 was processed using FreeSurfer (available at <http://surfer.nmr.mgh.harvard.edu>), and a standardized  
218 protocol (available at <http://enigma.ini.usc.edu/protocols/imaging-protocols/>) was used to check the  
219 quality of the segmentations before further analyses were performed. Hemisphere-specific frontal cortex  
220 CT and SA measurements were taken along with amygdala and hippocampal gray matter volume to  
221 assess brain morphometry of the fronto-limbic pathway. For the purpose of the current study, within each  
222 brain region (hippocampus and amygdala), we took the mean volume of the two hemispheres (e.g.,

223 hemisphere-mean hippocampal volume, hemisphere-mean amygdala volume). CT and SA develop along  
224 discordant temporal trajectories[73], and are affected in different manners based on underlying genetic  
225 sequence[74]. Based on this rationale, we examined CT and SA measures of frontal cortex subregions,  
226 instead of gray matter volume. Frontal cortex subregions included in the current study map to Brodmann's  
227 areas 8, 9, 10, 11, 24, 25, 32, and 46[25], and include FP, medial OFC (mOFC), lateral OFC (lOFC),  
228 SFG, RMFG, rostral ACC (rACC), and caudal ACC (cACC). For frontal cortex SA and CT, we used an  
229 average of values taken across hemispheres (e.g., hemisphere-mean RMFG SA, hemisphere-mean  
230 RMFG CT).

### 231 *Molecular*

232 Whole-blood was collected in EDTA vacuum tubes prior to DNA extraction. Genomic DNA was  
233 extracted and purified using the AllPrep DNA/RNA Mini Kit (Qiagen, Valencia, CA) using manufacturer  
234 recommended methods. DNA was denatured and bisulfite converted (BSC) using the EZ DNA Methylation-  
235 Gold™ Kit (Zymo Research, Irvine, CA). After conversion, BSC DNA was applied to the Infinium  
236 MethylationEPIC BeadChip (Illumina; San Diego, California) (850k) using manufacturer recommended  
237 protocol to measure DNA 5mC at ~850,000 loci.

238

### 239 *5mC pre-processing*

240 Beta-values measured from the 850k platform were background corrected with GenomeStudio,  
241 quality controlled (QCed), and filtered according to previously published methods[75]. All quality control and  
242 pre-processing was performed in R version 3.6.1[76]. These steps removed low quality and potentially  
243 cross-hybridizing probes, quantile-normalized probe Beta-values, and removed technical and batch  
244 effects[77-80]. 5mC beta-values were variance stabilized and logit-transformed into M-values[81]. X- and  
245 Y-chromosome-mapped probes were removed, along with rs-mapped probes. The remaining ~827k probes  
246 were then subset to include only those with observed nominally significant Pearson correlation ( $p < 0.05$ )  
247 between blood and brain tissue from the ImageCpG data repository[82], which focused analysis onto loci  
248 with greater prospect for proxy or surrogate status with etiologically-relevant CNS tissue. Following QC and  
249 filtering steps, 92,208 probes remained.

250



251 *Covariates*

252           Age, leukocyte cell estimates, intra-cranial volume (ICV), multi-dimensional scaling (MDS) of  
253 genomic ancestry, an epigenetic proxy of smoking[83], and current employment/disability status were  
254 included in models as covariates, where pertinent. *Leukocyte cell estimates*: DNAm measurements were  
255 used to estimate the proportions of granulocytes, monocytes, B cells, natural killer cells, CD4T and CD8T  
256 cells within each sample. Calculations were done according to methodology described in Houseman et  
257 al[84]. Estimated proportions of monocytes, B cells, natural killer cells, CD4T and CD8T were included as  
258 covariates in multiple regression models, where pertinent. *Genomic ancestry*: To avoid potential  
259 inaccuracies/confounding effects of self-reported race/ethnicity, genetic ancestry was modeled using MDS  
260 measures extracted from participant genome-wide association study (GWAS) data using PLINK[85]. The  
261 first four MDS genetic ancestry measures were chosen to be used as covariates based on visual inspection  
262 of scree plots, in line with previous work[86]. *Smoking*: Cigarette smoking is known to exert significant  
263 effects across the methylome[87]. Using a method discussed in detail elsewhere[88], the current study  
264 corrected for the methylomic effects of smoking by calculating effect size estimates of the top twenty-six  
265 probes from a recent smoking epigenome-wide association study (EWAS) performed in participants with  
266 African American genomic ancestry[83]. *Employment and disability*: As applied previously in the GTP [66],  
267 employment/disability status was considered as: unemployed; unemployed receiving disability support; or  
268 employed, with or without disability support.

269

270 *Probe clustering*

271           To remove non-desired effects from probe M-values, we composed linear models in R using age,  
272 leukocyte cell estimates, genomic ancestry, and the smoking proxy as predictors of probe-wise 5mC M-  
273 values. For each probe, residual values (“residualized M-values”) were extracted for clustering. Taking the  
274 92,208 residualized M-values, the “WGCNA” package was then used in R to build a co-methylation  
275 network[89]. First, scale-free topology model fit was analyzed. As recommended, a soft-threshold value of  
276 ten was chosen based on the lowest power at which adjusted  $R^2 > 0.90$ . Adjacency and dissimilarity  
277 matrices were generated, and unsupervised hierarchical clustering was used to generate a clustered  
278 residual M-value network. Setting a minimum cluster size of ten generated 73 clusters of 5mC probes,

279 where each cluster was identified by a unique color. After clustering, we extracted the first principal  
280 component of each cluster, referred to from here on as a “module eigengene” (ME). Compared to EWAS-  
281 type analyses, which assess differential methylation on the level of individual 5mC loci, network-based  
282 methods, as used in the current research, utilize dimension-reduction techniques to create networks of  
283 related 5mC probe clusters. This reduces the burden of multiple hypothesis testing across hundreds of  
284 thousands of probes, while enabling investigation into the biological significance of clustered probes, and  
285 provides the potential for increased statistical power in circumstances with a small number of biological  
286 replicates[90].

287

### 288 *Statistical analyses*

289 To understand the relationships between variables used throughout the current analyses, we  
290 carried out Pearson correlations and mapped their correlation coefficients. We then conducted a set of  
291 multi-variate linear regression analyses, as shown in Figure 1. Figure 1 Arm A analyses included  
292 hemisphere-mean hippocampus and amygdala volumes as dependent variables (in separate models).  
293 Income, education, CTQ total, and TEI were included as independent variables of interest, whereas  
294 genomic ancestry, age, employment/disability and ICV were included as covariates. The same predictors  
295 and covariates were included, minus ICV, to predict frontal cortex subregions SA and CT measures. Overall  
296 CT and/or SA were not included as covariates based on prior work with this cohort[91]. Figure 1 Arm B  
297 analyses included 5mC MEs as dependent variables (in separate models). Income, education, CTQ total,  
298 and TEI were included as independent variables of interest, and employment/disability was included as a  
299 covariate. Covariates were limited in this stage of analysis due to the removal of confounding effects  
300 through residual extraction in prior pre-processing steps. Figure 1 Arm C analyses included individual  
301 fronto-limbic morphometry measures as dependent variables (in separate models). Individual 5mC MEs  
302 were included as independent variables of interest, whereas age, genomic ancestry, employment, and ICV  
303 (ICV was only included in hippocampus and amygdala models) were included as covariates. Within each  
304 phase of the analyses, including mediation analyses, continuous dependent and independent variables  
305 were standardized, resulting in standardized effect estimates. Nominal p-values were corrected for multiple  
306 hypothesis testing by controlling the false discovery rate (FDR=0.10) using the Benjamini Hochberg (BH)

307 procedure(85). Briefly, for each nominal p-value, a BH critical value was calculated where nominal p-value's  
308 assigned rank over the number of tests was multiplied by the accepted FDR. Nominal p-values less than  
309 this threshold were deemed BH-significant. Due to the exploratory nature of the current work, both nominal  
310 and BH-significant terms were considered for interpretation; and nominal p-values are presented within the  
311 results section of the current text.

312

### 313 *Mediation analyses*

314 MEs were tested for statistical mediating status between independent variables of interest (ASEs)  
315 and dependent variables (hemisphere-mean fronto-limbic brain morphometry) using the “mediation”  
316 package in R (Figure 1). Importantly, only fronto-limbic brain morphometry measures nominally associated  
317 with income, education, CTQ total or TEI (Figure 1, Arm A) were considered. Similarly, MEs tested for  
318 mediation included only those nominally associated with an exposure (Figure 1, Arm B) and a fronto-limbic  
319 brain morphometry measure (Figure 1, Arm C). For each ME, average indirect effect (IDE), direct effect  
320 (DE), and total effect estimates and confidence intervals were calculated as a result of 10,000 quasi-  
321 Bayesian Monte Carlo approximations, applied with the mediation package. Consistent with methodology  
322 employed in the field [92, 93], we considered an ME a full mediator if the DE=0 while the IDE and total  
323 effect  $\neq 0$ , or a partial mediator if the DE, IDE, and total effect (TE)  $\neq 0$ . Individual probes from full mediator  
324 modules were assessed for mediation status, in order to gain insight into potential locus-specific mediation  
325 effects.

326

### 327 *Gene set enrichment analyses*

328 To assess underlying methylomic network enrichment, all four ASEs of interest were included in  
329 linear models as either independent variables or covariates, where individual residualized probe M-values  
330 were included as dependent variables, while controlling for employment/disability status. Importantly, only  
331 exposures with a fully-mediating 5mC cluster were considered independent variables of interest. Other  
332 exposures which did not exhibit a fully-mediating 5mC cluster were considered as covariates. For  
333 probes/ASEs with nominally significant relationships ( $p < 0.05$ ), we extracted probe p-values and probe  
334 names and used them as input to gene set enrichment analyses (GSEA) with the “methylGSA” package[94].

335 Importantly, ASE-associated probe p-values were only captured for ASEs in which a full mediator was  
336 previously observed, which limited analyses to CTQ only. GO sets of 25 to 1,000 genes were allowed,  
337 eliminating high-level GO-terms such as “biological process”, which facilitated testing of 5,478 gene sets.  
338 To produce a condensed summary of non-redundant GO-terms, the web-based tool “Revigo” was used[95].  
339

## 340 **Results**

### 341 *Study participants*

342 Descriptive statistics for demographic and psychosocial measures in study participants are shown  
343 in Table 1. Thirty percent of the sample reported household income in the range of \$0 to \$499 per month,  
344 while 34% of the sample reported household income above \$1000 per month. Fifteen percent of the sample  
345 reported not having finished high school, whereas 55% of the sample reported having more schooling than  
346 high school. Mean CTQ total value for participants was 40.5 (+/- 15.4), whereas mean TEI value for  
347 participants was 4.2 (+/- 2.3). Pearson correlations between variables used in the current study are shown  
348 in Figure 2.

349

### 350 *ASEs predict fronto-limbic brain morphometry*

351 At nominal significance, CTQ total was negatively associated with RMFG SA ( $\beta = -0.231$ , SE =  
352 0.111,  $t = -2.079$ ,  $p = 0.041$ ), but was not associated with other outcomes of interest ( $p > 0.05$ ). Relative to  
353 high educational attainment (completed more schooling than high school), low educational attainment (no  
354 high school certificate) was negatively associated with cACC SA ( $\beta = -0.855$ , SE = 0.280,  $t = -3.049$ ,  $p =$   
355 0.003), and positively associated with FP CT ( $\beta = 0.684$ , SE = 0.302,  $t = 2.267$ ,  $p = 0.026$ ) and SFG CT ( $\beta$   
356 = 0.553, SE = 0.256,  $t = 2.162$ ,  $p = 0.034$ ) at the nominal significance threshold, but no other brain  
357 morphometry outcomes of interest ( $p > 0.05$ ). On the other hand, relative to high income (\$1000+/month),  
358 low income (\$0-\$499/month) was nominally negatively associated with amygdala GMV ( $\beta = -0.649$ , SE =  
359 0.283,  $t = -2.299$ ,  $p = 0.024$ ), but no other neuroimaging outcome of interest ( $p > 0.05$ ). TEI was not  
360 associated with any neuroimaging measures ( $p > 0.05$ ). Nominally significant model outcomes can be found  
361 in Table 2. In controlling for 64 total tests at FDR = 0.10, no outcomes were BH-significant. Brain  
362 morphometry outcomes nominally associated with ASEs were carried into downstream analyses.

363

364 *ASEs predict 5mC ME*

365 CTQ total was nominally associated with seven MEs, the strongest of which were Darkolivegreen  
366 (Darkolivegreen  $\beta = 0.354$ , SE = 0.110,  $t = 3.214$ ,  $p = 0.002$ ) and Steelblue (Steelblue  $\beta = - 0.306$ , SE =  
367 0.111,  $t = - 2.748$ ,  $p = 0.007$ ). Compared to high educational attainment, low educational attainment was  
368 positively associated with one ME (Coral1  $\beta = 0.750$ , SE = 0.286,  $t = 2.618$ ,  $p = 0.010$ ), and negatively  
369 associated with one ME (Lightcoral  $\beta = - 0.615$ , SE = 0.296,  $t = - 2.079$ ,  $p = 0.040$ ) at nominal levels.  
370 Relative to high income (\$1000+/month), low income (\$0-\$499/month) was positively associated with three  
371 MEs (Antiquewhite4  $\beta = 0.770$ , SE = 0.277,  $t = 2.781$ ,  $p = 0.007$ ; Indianred4  $\beta = 0.717$ , SE = 0.276,  $t =$   
372 2.602,  $p = 0.011$ ; Orange  $\beta = 0.571$ , SE = 0.274,  $t = 2.084$ ,  $p = 0.040$ ) at nominal levels. Because TEI was  
373 not associated with any fronto-limbic brain morphometric measures (Figure 1, Arm A), we do not report any  
374 results for this exposure. Results from all Arm B analyses can be found in Supplementary Table 1. In  
375 controlling for 73 tests at FDR = 0.10, no outcomes were BH-significant. 5mC MEs nominally associated  
376 with ASEs were carried into downstream analyses.

377

378 *5mC MEs predict fronto-limbic brain morphometry*

379 Four out of seven CTQ-associated MEs showed a nominally significant relationship with  
380 hemisphere-mean RMFG SA (Maroon, White, Tan, Yellow). The three strongest relationships were the  
381 Maroon ME ( $\beta = - 0.451$ , SE = 0.091,  $t = - 4.966$ ,  $p = 3 \times 10^{-6}$ ) (Figure 3a), White ME ( $\beta = - 0.392$ , SE =  
382 0.093,  $t = - 4.231$ ,  $p = 6 \times 10^{-5}$ ) (Figure 3b), and Tan ME ( $\beta = 0.233$ , SE = 0.100,  $t = 2.322$ ,  $p = 0.023$ ) (Figure  
383 3c). Two low educational attainment-associated MEs were tested independently for associations with  
384 hemisphere-mean cACC SA, frontal pole CT, and SFG CT. Of these, the Lightcoral ME was nominally  
385 associated with cACC SA ( $\beta = 0.215$ , SE = 0.099,  $t = 2.182$ ,  $p = 0.032$ ) (Figure 3d). Finally, of the three low  
386 income-associated MEs, none showed a nominally significant relationship with hemisphere-mean  
387 amygdala volume (Supplementary Table 2). In controlling for 16 tests at FDR = 0.10, the Maroon and White  
388 ME relationships with hemisphere-mean RMFG SA were BH-significant. 5mC MEs nominally associated  
389 with fronto-limbic brain morphometry measures were carried into downstream analyses.

390

391 *ME mediation*

392 Four CTQ-associated MEs that also showed a nominally significant relationship with hemisphere-  
393 mean RMFG SA were tested for their mediating status between CTQ total and hemisphere-mean RMFG  
394 SA (Maroon, White, Tan, Yellow). Both the Maroon ME (TE  $\beta = -0.983$ ,  $p = 0.047$ ; IDE  $\beta = -0.466$ ,  $p = 0.008$ ;  
395 DE  $\beta = -0.517$ ,  $p = 0.277$ ) and the White ME (TE  $\beta = -1.014$ ,  $p = 0.034$ ; IDE  $\beta = -0.348$ ,  $p = 0.032$ ; DE  $\beta =$   
396  $-0.667$ ,  $p = 0.164$ ) were full mediators of this relationship. TE results show that RMFG SA was an estimated  
397  $\sim 589$  mm<sup>2</sup> lower at the highest levels of CTQ exposure compared to the lowest levels of CTQ exposure.  
398 Independently, the Maroon ME accounted for 275 mm<sup>2</sup> (47%) of that effect, whereas the White ME  
399 accounted for 204 mm<sup>2</sup> (34%). Neither the Tan nor Yellow MEs were partial or full mediators of the  
400 relationship between CTQ and hemisphere-mean RMFG SA (TE  $p < 0.05$ ; IDE  $p > 0.05$ ; DE  $p > 0.05$ ),  
401 although the direction of TEs in these analyses closely mirrored those in the Maroon and White ME  
402 mediation analyses. The Lightcoral ME, which we previously observed to be associated with low education  
403 attainment and cACC SA, was neither a partial nor full mediator of the relationship between low education  
404 attainment and hemisphere-mean cACC SA (TE  $\beta = -0.844$ ,  $p = 0.003$ ; IDE  $\beta = -0.107$ ,  $p = 0.100$ ; DE  $\beta = -$   
405  $0.737$ ,  $p = 0.010$ ). However, the DE indicates that low educational attainment status accounted for cACC  
406 SA that is 84 mm<sup>2</sup> smaller than high educational attainment status. In controlling for ten tests of the IDE  
407 and DE p-values for the five relationships above at FDR = 0.10, all nominally significant ME IDEs were BH-  
408 significant and all DEs remained non-significant (Table 3). Follow-up mediation analyses were then  
409 performed on individual probes from the Maroon and White modules.

410

411 *Probe-wise mediation: Maroon module*

412 Six out of the 11 Maroon ME probes were full mediators of the relationship between CTQ total and  
413 RMFG SA (Table 4). The top three strongest mediators based on IDE  $\beta$  coefficients were: cg21622733 (TE  
414  $\beta = -0.983$ ,  $p = 0.044$ ; IDE  $\beta = -0.512$ ,  $p = 0.003$ ; DE  $\beta = -0.471$ ,  $p = 0.320$ ), cg19805668 (TE  $\beta = -1.003$ ,  $p$   
415  $= 0.042$ ; IDE  $\beta = -0.411$ ,  $p = 0.009$ ; DE  $\beta = -0.592$ ,  $p = 0.217$ ), and cg03710029 (TE  $\beta = -0.990$ ,  $p = 0.048$ ;  
416 IDE  $\beta = -0.321$ ,  $p = 0.019$ ; DE  $\beta = -0.670$ ,  $p = 0.182$ ). Respectively, these probes mapped to the long  
417 intergenic non-coding (LINC) RNA gene *LINC01531*, the placental growth factor gene *PGF*, and the solute  
418 carrier family 38 member 10 gene *SLC38A10*. The other three full mediating probes mapped to myosin

419 heavy chain 14 (*MYH14*), DNA methyltransferase 3 alpha (*DNMT3A*), and neuralized E3 ubiquitin protein  
420 ligase 4 (*NEURL4*). In controlling for 22 tests of Maroon probe IDE and DE p-values, only two nominally  
421 significant probes were also BH-significant (cg21622733: *LINC01531* and cg19805668: *PGF*).  
422 Comprehensive probe-wise mediation results are found in Supplementary Table 3.

423 In all, probes from the Maroon module map to eight known protein coding genes (*MYH14*,  
424 *HGSNAT*, *SFTPA1*, *PGF*, *NEURL4*, *DNMT3A*, *SLC38A10*, and *PEBP4*) and two non-coding RNAs  
425 (*LINC01531* and *MIR3659HG*). GO-terms associated with these loci include: *MYH14* (neuronal action  
426 potential GO:0019228, actomyosin structure organization GO:0031032), *HGSNAT* (lysosomal transport  
427 GO:0007041, neutrophil degranulation GO:0043312), *SFTPA1* (toll-like receptor signaling pathway  
428 GO:0002224), *PGF* (chemoattractant activity GO:0042056, vascular endothelial growth factor receptor  
429 binding GO:0005172), *NEURL4* (ubiquitin protein ligase activity GO:0061630), *DNMT3A* (DNA (cytosine-  
430 5-methyltransferase activity GO:0003886), *SLC38A10* (amino acid transmembrane transporter activity  
431 GO:0015171), and *PEBP4* (protein binding GO:0005515), among others.

432

#### 433 *Probe-wise mediation: White module*

434 Three out of 19 White ME probes were full mediators of the relationship between CTQ total and  
435 RMFG SA (Table 4): cg01544227 (TE  $\beta = -0.994$ ,  $p = 0.044$ ; IDE  $\beta = -0.305$ ,  $p = 0.036$ ; DE  $\beta = -0.689$ ,  $p =$   
436  $0.175$ ), cg00686169 (TE  $\beta = -1.017$ ,  $p = 0.037$ ; IDE  $\beta = -0.277$ ,  $p = 0.043$ ; DE  $\beta = -0.740$ ,  $p = 0.126$ ), and  
437 cg08002107 (TE  $\beta = -1.006$ ,  $p = 0.040$ ; IDE  $\beta = -0.268$ ,  $p = 0.047$ ; DE  $\beta = -0.738$ ,  $p = 0.122$ ). These three  
438 probes mapped to *AC092745.5*, *FAM90A24P*, and *USP17L7* loci, respectively. In controlling for 38 tests of  
439 White probe IDE and DE p-values, no nominally significant probes were BH-significant. Comprehensive  
440 probe-wise mediation results are found in Supplementary Table 3.

441 In all, only one probe from the White module maps to a known protein coding gene, *USP17L7*,  
442 which is associated with the thiol-dependent de-ubiquitinase GO term (GO:0004843). One other probe  
443 maps to a LINC RNA, *FAM66D*. The remaining probes map to a pseudogene family, named family with  
444 sequence similarity 90. Members include: *FAM90A10*, *FAM90A11P*, *FAM90A20*, *FAM90A24P*,  
445 *FAM90A25P*, *FAM90A5*, *FAM90A6P*, and *FAM90A7*. The only GO term associated with these  
446 pseudogenes is nucleic acid binding (GO:0003676).

447

448 *Gene set enrichment analysis*

449 CTQ total was included as the independent variable of interest in linear models with probe  
450 residualized M-values as dependent variables. Income, education, and TEI were included and considered  
451 as covariates, as no 5mC clusters mediated the relationships between our exposures and outcomes of  
452 interest. We used the resultant 6,335 nominally significant p-values and probe names as GSEA input,  
453 facilitating the testing of 5,478 GO-terms. After Revigo redundancy reduction, 30 BH-significant GO-terms  
454 remained for interpretation. These included immune-related GO-terms: macrophage migration  
455 (GO:1905517,  $p = 9 \times 10^{-8}$ , rank = 10), T cell receptor complex (GO:0042101,  $p = 6 \times 10^{-6}$ , rank = 13), and  
456 chemokine-mediated signaling pathway (GO:0070098,  $p = 7 \times 10^{-4}$ , rank = 28), among four others. Two  
457 CNS-related GO-terms were present: negative regulation of smoothened signaling pathway (GO:0045879,  
458  $p = 2 \times 10^{-6}$ , rank = 12), and glutamine family amino acid biosynthetic process (GO:0009084,  $p = 1 \times 10^{-4}$ , rank  
459 = 19), along with one HPA-axis related term: thyroid hormone metabolic process (GO:0042403,  $p = 2 \times 10^{-$   
460  $^{15}$ , rank = 5). Additionally, numerous signal transduction and membrane transport GO-terms were present:  
461 positive regulation of phospholipase activity (GO:0010518,  $p = 5 \times 10^{-25}$ , rank = 1), intrinsic component of  
462 peroxisomal membrane (GO:0031231,  $p = 7 \times 10^{-18}$ , rank = 2), and RNA polymerase II carboxy-terminal  
463 domain kinase activity (GO:0008353,  $p = 8 \times 10^{-15}$ , rank = 6), among others (Supplementary Table 4).

464

465 **Discussion**

466 Here we applied genome-scale approaches to a sample of African American women from a low  
467 income, highly trauma exposed environment, representing an understudied population, where our main  
468 goal was to assess whether blood-derived 5mC cluster MEs might index CNS endophenotypes of stress-  
469 related psychiatric illness. Our study findings indicate that high childhood trauma burden, low educational  
470 attainment, and low income are each associated with CNS endophenotypes of stress-related psychiatric  
471 illness, and that a subset of blood-derived 5mC MEs statistically mediate the relationship between childhood  
472 trauma burden and RMFG SA. We further found that the individual probes from mediating 5mC MEs fell in  
473 genes with CNS-relevant and immune system GO-functions. Finally, we found that the underlying childhood  
474 trauma burden-associated methylomic network was enriched with HPA-axis, immune, and CNS-related



475 gene sets, in addition to signal transduction and membrane transport functions. Overall, we posit that the  
476 peripheral epigenetic signatures mediating our relationships of interest are consistent with previously  
477 observed patterns in which stress-related psychiatric illness is accompanied by profiles of peripheral  
478 inflammation[31, 96-98].

479 In the current study, childhood trauma burden was negatively associated with hemisphere-mean  
480 RMFG SA, which mirrors findings from cohorts enriched for stress, trauma, and psychiatric illness[99, 100].  
481 We also observed higher CT of both the FP and SFG in participants with low educational attainment, as  
482 well as higher cACC SA. Although studies on FP CT and ASEs (besides trauma) are somewhat limited, our  
483 findings support past research investigating whether high CT is representative of a predisposition to  
484 psychiatric illness development, or whether high CT emerges after psychiatric illness onset. Specifically,  
485 prior longitudinal work showed higher cortical thickness in participants at high risk of mood disorder  
486 compared to healthy controls at baseline; the high-risk participants who went on to develop MDD then  
487 showed increased FP CT over the two-year time period following their diagnosis[101]. This research implies  
488 that high FP CT could represent both a predisposition to MDD development risk, and a post-onset emergent  
489 phenotype of MDD.

490 Our study also showed that low household income was negatively associated with hemisphere-  
491 mean amygdala GMV. This finding aligns with research in children/adolescents showing that low familial  
492 income-to-needs ratio is associated with decreased amygdala GMV [92], and with studies in adults showing  
493 that past year financial hardship is associated with decreased amygdala GMV [102]. However, the  
494 relationships between socioeconomic status-related measures and amygdala GMV are well-studied, and  
495 variable conclusions between studies are common[103]. Hemisphere-mean hippocampal volume was not  
496 associated with any ASE; as in the case of amygdala GMV, study conclusions are mixed[103].

497 In all, four blood-derived MEs were tested for mediating status between childhood trauma burden  
498 and RMFG SA. Both the Maroon and the White ME fully mediated the relationship and accounted for  
499 significant proportions of variability (47% and 35% respectively). The Maroon module is composed of 11  
500 probes, six of which are also full mediators of the aforementioned relationship. The six probes fully  
501 mediating the childhood trauma burden and RMFG SA relationship are located in the *MYH14*, *PGF*,  
502 *NEURL4*, *DNMT3A*, *SLC38A10*, and *LINC01531*. GO-terms associated with these loci include: *MYH14*

503 (neuronal action potential GO:0019228, actomyosin structure organization GO:0031032), *PGF*  
504 (chemoattractant activity GO:0042056, vascular endothelial growth factor receptor binding GO:0005172),  
505 *NEURL4* (ubiquitin protein ligase activity GO:0061630), *DNMT3A* (DNA (cytosine-5-methyltransferase  
506 activity GO:0003886), and *SLC38A10* (amino acid transmembrane transporter activity GO:0015171). Of  
507 particular interest is the probe falling in the *DNMT3A* gene. Past longitudinal study in a predominantly  
508 female African American sample showed differential blood *DNMT3A* 5mC in response to traumatic event  
509 exposure[104], and emerging work focused specifically on African ancestry individuals has identified a  
510 genome-wide significant association in *DNMT3A* in relation to MDD[105]. What is more, in a rodent model  
511 of fear conditioning, *Dnmt3a* mRNA expression is altered in forebrain neurons, leading to differential DNA  
512 5mC of synaptic plasticity and memory formation genes[106]. *Dnmt3A* mRNA expression in rodent nucleus  
513 accumbens is also altered in response to chronic restraint stress, and targeted inhibition of *Dnmt3A* 5mC  
514 potentiates anti-depressant-like effects[107]. Based on the current and prior findings, it appears that the  
515 *DNMT3A* gene in humans is a potential locus of stress- or trauma-related biological embedding, and that  
516 measurements of *DNMT3A* 5mC taken from peripheral tissues could be indexing fronto-limbic variability  
517 associated with these exposures. Overall, our findings in the Maroon module imply that immune signaling,  
518 cellular proliferation, neuronal development, and epigenetic regulatory pathways could be potential  
519 substrates for the biological embedding of childhood trauma.

520         The second fully mediating ME was the White module comprised of 19 probes, three of which were  
521 full mediators of the relation between CTQ total and RMFG SA. Thirteen probes from this module are  
522 mapped to the “Family with sequence similarity 90” superfamily of pseudogenes, and all but two probes  
523 exist in a one megabase stretch of chromosome eight. The three full mediator probes (cg00686169,  
524 cg01544227, and cg08002107) fall in the *FAM90A24P*, *LINC00937*, and *FAM66D* loci, respectively. Little  
525 is known of the *FAM90A24P* locus, but the *LINC00937* locus encodes a LINC RNA species that is strongly  
526 associated with cutaneous melanoma prognosis[108], as well as endocervical cancer progression[109],  
527 suggesting that it plays a role in cellular proliferation. On the other hand, the *FAM66D* locus encodes a  
528 LINC RNA species whose expression is significantly upregulated in both Crohn’s disease (CD) and  
529 ulcerative colitis (UC), the two most common types of inflammatory bowel disease (IBD)[110]. Efforts made  
530 towards elucidating the function of the broader chromosome eight locus highlight its structurally dynamic

531 nature, in addition to its harboring of the defensin genes, the protein products of which play significant roles  
532 in the innate immune response, as well as antitumor response[111]. Defensin proteins are also recognized  
533 as key contributors to innate immune defense against UC, CD, and IBD in general[112].

534 Taken together, results suggest that probes mediating the childhood trauma burden and RMFG SA  
535 relationship interact with endothelial growth and innate immune response regulatory pathways. This notion  
536 is supported by repeated observation of increased blood-based inflammation profiles, as measured in  
537 adults that had previously experienced childhood trauma exposure [113-115]. More CNS-focused research  
538 has also shown significant dysregulation of stress-response and inflammation-related mRNA/protein levels  
539 in post-mortem frontal cortex of patients with neurodevelopmental[116] and psychiatric illnesses[117, 118].  
540 What is more, decreased CT of medial pre-frontal cortex is observed in MDD patients, a relationship that  
541 was partially mediated by inflammatory factors known to influence neuroplasticity[119]. However, the  
542 relevant studies informing our current results are sparse, and could be considered underpowered. Thus,  
543 while suggestive, more work remains to be done in order to draw robust inferences regarding the  
544 relationship between peripheral inflammation and neural endophenotypes of stress-related psychiatric  
545 illness.

546 In our GSEA of childhood trauma burden -associated probes, the top enriched term was “positive  
547 regulation of phospholipase activity”, meaning that multiple probes fall in genes that increase the frequency,  
548 rate, or extent of phospholipase activity. Of close relation is the 11<sup>th</sup> ranked GO-term, “inositol phosphate  
549 phosphatase activity”. Together, these terms represent one of the major mechanisms of neuronal and  
550 hormonal signal transduction in mammals, the activation of phospholipase C (PLC) and subsequent  
551 activation of inositol signaling pathways[120]. In brief, extracellular stimuli receptor binding activates PLC.  
552 PLC then functions to convert phosphatidylinositol-4-5 bisphosphate (P45P2) into inositol-1-4-5  
553 trisphosphate (I145P3). From this, the kinase-activating secondary messenger diacylglycerol (DAG) is  
554 activated[120]. There are many isoforms of the PLC enzyme family, but PLC- $\delta$ 1 is strongly implicated in  
555 regulating cell-motility and cytoskeletal organization[121], and in inhibiting inflammatory immune  
556 responses[122]. Quantities of this PLC isoform, PLC- $\delta$ 1, are highly correlated with nuclear levels of  
557 P45P2[123]; interestingly, P45P2 regulates transcription through binding interaction with the RNA  
558 polymerase II C-terminal tail[124]. The aforementioned processes are specifically represented within our

559 GSEA results (Supplementary Table 4): RNA polymerase II carboxy-terminal domain kinase activity,  
560 regulation of mitotic spindle organization, and numerous immune signaling and motility terms. Given  
561 childhood trauma burden is the ASE implicated most strongly in our results, it stands to reason that in this  
562 sample of African American women, peripheral inflammatory signals could be heightened in those with high  
563 childhood trauma burden, and phospholipase activity may be upregulated in an attempt to restore  
564 homeostatic balance.

565 Overall, we posit that the blood-based epigenetic signatures mediating our relationships of interest  
566 are potentially explained by ASE-associated peripheral inflammation. In response to perceived stress or  
567 trauma, fronto-limbic brain regions associated with cognitive function, emotional reactivity, and memory are  
568 activated, signaling to the HPA-axis' neural hub, and eventually potentiating glucocorticoid (GC) release.  
569 Critical to immunological, metabolic, cardiac, and homeostatic functions, GCs act mechanistically in and  
570 around the CNS and peripheral nervous system, including serving as a long-range negative feedback  
571 mechanism to inhibit further HPA-axis activity. Additionally, the ligands and receptors of cytokines and  
572 neurotransmitters are shared throughout the CNS, HPA-axis, and immune systems[125, 126]. Chronic  
573 stress signaling can result in neural growth, inflammation, metabolism, and stress-related pathway  
574 disruption through molecular and epigenetic mechanisms[40], which are consistent with 5mC-derived  
575 patterns observed in peripheral tissue in the current report.

576 The foremost strength of the current research is the inclusion of multi-modal data types  
577 (epigenetic/neuroimaging) to characterize the biological embedding of ASEs. Furthermore, the dimension  
578 reduction techniques used in the current work, clustering and principal component extraction, were valuable  
579 in reducing the burden of multiple hypothesis testing and in describing potentially related networks of 5mC  
580 loci. It also focused the analysis onto loci with greater prospect for proxy or surrogate status with  
581 etiologically-relevant CNS tissue. The composition of the sample is also a strength of the current work, as  
582 it reflects an understudied population at elevated risk for PTSD and for persistence of stress-related  
583 psychiatric illness[127]. However, because of the homogenous nature of the sample, we are unable to make  
584 confident conclusions about ancestry-specific or sex-specific effects. Limitations of the current study include  
585 relatively small sample size and the inability to infer causality from cross-sectional samples. In addition, the  
586 current research used peripheral tissue in lieu of etiological CNS tissue for obvious technical reasons.

587 Functional MRI measures such as neurotransmitter specific PET imaging could also provide deeper  
588 endophenotypic insights. Future studies on this topic should capture longitudinal data from a larger sample  
589 and could investigate genetic factors or tissues of etiological interest.

590         The current study showed that exposure to high childhood trauma burden, low educational  
591 attainment, and low income are each associated with neuroimaging endophenotypes of psychiatric illness,  
592 and that the relationship between childhood trauma and RFMG SA in particular is mediated by a subset of  
593 blood-derived 5mC measurements. In addition, we found that the mediating 5mC MEs were enriched with  
594 probes falling in genomic regulatory regions, and in genes with CNS-relevant and immune system GO-  
595 functions. Finally, we found that the underlying childhood trauma burden-associated methylomic network  
596 was enriched with HPA-axis, immune, and CNS-related gene sets. Together, these results highlight a  
597 feasible epigenetic mechanism through which ASEs become embedded in human physiological systems,  
598 and through which they contribute to the development of stress-related psychiatric illness. Although these  
599 concepts are broadly applicable across race, ethnicity, and biological sex, the current results highlight  
600 mechanisms of biological embedding that may be specific to African American women. These epigenetic  
601 signatures could be taken as peripheral biomarkers of perturbed underlying neurobiology associated with  
602 ASEs, and could further research efforts into etiological tissues of interest such as endocrine, immune, and  
603 CNS cell types. These findings could also serve to potentiate increased investigation of understudied  
604 populations at significant risk for onset or persistence of certain stress-related psychiatric illnesses.

605 **Acknowledgements**

606

607 This work was supported by the National Institutes of Mental Health (MH096764, MH071537, MH098212,  
608 MH111671, MH101380 and 2R01MH108826) and the National Institute of Minority Health and Health  
609 Disparities (2R01MD011728). Support was also received from Emory and Grady Memorial Hospital  
610 General Clinical Research Center, NIH National Centers for Research Resources (M01RR00039) and  
611 Howard Hughes Medical Institute.

612

613 **Conflict of interest**

614 The authors report no conflicts of interest.

615

616 **Data Availability Statement**

617 DNA methylation data analyzed in this paper are available at <https://www.ncbi.nlm.nih.gov/geo/> (dataset  
618 GSE132203). Individual-level neuroimaging data will be made available to researchers following an  
619 approved analysis proposal through the GTP. For additional information on access to these data,  
620 including PI contact information for the GTP, please contact the corresponding author.

621

622

## 623 Figure Legends

624 **Figure 1.** Conceptual model testing individual module eigengenes (MEs) as mediators of the hypothesized  
625 associations between adverse social exposures (ASEs) and variability in fronto-limbic brain morphometries.  
626 Arm A. Analyses included hemisphere-mean hippocampus and amygdala volumes as dependent variables  
627 (in separate models). Income, education, CTQ total, and TEI were included as independent variables of  
628 interest, whereas genomic ancestry, age, employment/disability and ICV were included as covariates. The  
629 same predictors and covariates were included, minus ICV, to predict frontal cortex subregions SA and CT  
630 measures. Arm B. Analyses included 5mC MEs as dependent variables (in separate models). Income,  
631 education, CTQ total, and TEI were included as independent variables of interest, and  
632 employment/disability was included as a covariate. Arm C. Analyses included individual fronto-limbic  
633 morphometry measures as dependent variables (in separate models). Individual 5mC MEs were included  
634 as independent variables of interest, whereas age, genomic ancestry, employment, and ICV (ICV was only  
635 included in hippocampus and amygdala models) were included as covariates.  
636

637 **Figure 2.** Pearson's correlation heatmap of variables used throughout the current study. Age is negatively  
638 associated with multiple frontal cortex cortical thickness (CT) measures (Pearson's correlation  $r_{\text{range}} = -0.15$   
639 to  $-0.47$ ,  $p_{\text{range}} = 0.092$  to  $6 \times 10^{-7}$ ). Within frontal cortex CT measures, multiple subregions show positive  
640 correlations with one another (Pearson's correlation  $r_{\text{range}} = 0.32$  to  $0.84$ ,  $p_{\text{range}} = 0.004$  to  $< 2 \times 10^{-16}$ ). The  
641 same phenomenon is observed within frontal cortex surface area (SA) measures (Pearson's correlation  
642  $r_{\text{range}} = 0.16$  to  $0.77$ ,  $p_{\text{range}} = 0.210$  to  $< 2 \times 10^{-16}$ ). Overall CT is positively correlated with each of the frontal  
643 cortex CT measures (Pearson's correlation  $r_{\text{range}} = 0.43$  to  $0.86$ ,  $p_{\text{range}} = 1 \times 10^{-7}$  to  $< 2 \times 10^{-16}$ ), and overall SA  
644 is positively correlated with each of the frontal cortex SA measures (Pearson's correlation  $r_{\text{range}} = 0.37$  to  
645  $0.88$ ,  $p_{\text{range}} = 5 \times 10^{-4}$  to  $< 2 \times 10^{-16}$ ).  
646

647 **Figure 3.** CTQ total is negatively associated with rostral middle frontal gyrus (RMFG) surface area (SA).  
648 Low educational attainment status is associated with low caudal anterior cingulate cortex (cACC) SA. Out  
649 of seven CTQ-associated module eigengenes (MEs), the three strongest relationships with hemisphere-  
650 mean RMFG SA were the Maroon (A), White (B), and Tan (C) MEs. Out of two low education attainment-  
651 associated MEs, the strongest relationship with hemisphere-mean cACC SA was the Lightcoral ME (D). As  
652 shown, neuroimaging measures are adjusted by age, ME value, genomic ancestry, employment/disability  
653 status, and an adverse social exposure (ASE). Dependent and independent variables were scaled. A. CTQ  
654 total was positively associated with the Maroon ME ( $\beta = 0.289$ ,  $SE = 0.109$ ,  $t = 2.639$ ,  $p = 9.8 \times 10^{-3}$ ). In turn,  
655 the Maroon ME was negatively associated with RMFG SA ( $\beta = -0.451$ ,  $SE = 0.091$ ,  $t = -4.966$ ,  $p = 3 \times 10^{-6}$ ).  
656 B. CTQ total was negatively associated with the Tan ME ( $\beta = -0.248$ ,  $SE = 0.112$ ,  $t = -2.220$ ,  $p = 0.029$ ).  
657 The Tan ME was, in turn, positively associated with RMFG SA ( $\beta = 0.233$ ,  $SE = 0.100$ ,  $t = 2.322$ ,  $p = 0.023$ ).  
658 C. CTQ total was positively associated with the White ME ( $\beta = 0.236$ ,  $SE = 0.110$ ,  $t = 2.151$ ,  $p = 0.034$ ). In  
659 turn, the White ME was negatively associated with RMFG SA ( $\beta = -0.392$ ,  $SE = 0.093$ ,  $t = -4.231$ ,  $p =$   
660  $6 \times 10^{-5}$ ). D. Low educational attainment (no high school certificate) was associated with the Lightcoral ME  
661 ( $\beta = -0.615$ ,  $SE = 0.296$ ,  $t = -2.079$ ,  $p = 0.040$ ). The Lightcoral ME, in turn, was positively associated with  
662 cACC SA ( $\beta = 0.215$ ,  $SE = 0.099$ ,  $t = 2.182$ ,  $p = 0.032$ ).  
663  
664

665 **References**

- 666 1. Semega J, Kollar M, Creamer J, and Mohanty A. *Income and poverty in the United States: 2018*  
667 2019; Available from: <https://www.census.gov/library/publications/2019/demo/p60-266.html>.  
668 2019.
- 669 2. Martin A, Markhvida M, Hallegatte S, and Walsh B. Socio-Economic Impacts of COVID-19 on  
670 Household Consumption and Poverty. *Economics of Disasters and Climate Change* 4, 453-479  
671 (2020).
- 672 3. Tyler JH and Lofstrom M. Finishing High School: Alternative Pathways and Dropout Recovery. *The*  
673 *Future of Children* 19, 77-103 (2009).
- 674 4. Gilbert R, Widom CS, Browne K, Fergusson D, Webb E, and Janson S. Burden and consequences  
675 of child maltreatment in high-income countries. *The Lancet* 373, 68-81 (2009).
- 676 5. Roberts AL, Gilman SE, Breslau J, Breslau N, and Koenen KC. Race/ethnic differences in exposure  
677 to traumatic events, development of post-traumatic stress disorder, and treatment-seeking for post-  
678 traumatic stress disorder in the United States. *Psychological Medicine* 41, 71-83 (2011).
- 679 6. Kessler RC. Posttraumatic Stress Disorder in the National Comorbidity Survey. *Archives of General*  
680 *Psychiatry* 52, 1048 (1995).
- 681 7. Breslau N. The Epidemiology of Trauma, PTSD, and Other Posttrauma Disorders. *Trauma,*  
682 *Violence, & Abuse* 10, 198-210 (2009).
- 683 8. Kilpatrick DG, Resnick HS, Milanak ME, Miller MW, Keyes KM, and Friedman MJ. National  
684 Estimates of Exposure to Traumatic Events and PTSD Prevalence Using *DSM-IV* and *DSM-5*  
685 Criteria: *DSM-5 PTSD Prevalence*. *Journal of Traumatic Stress* 26, 537-547 (2013).
- 686 9. Wadsworth ME, Raviv T, Santiago CD, and Etter EM. Testing the Adaptation to Poverty-Related  
687 Stress Model: Predicting Psychopathology Symptoms in Families Facing Economic Hardship.  
688 *Journal of Clinical Child & Adolescent Psychology* 40, 646-657 (2011).
- 689 10. Organization WH. Cross-national comparisons of the prevalences and correlates of mental  
690 disorders. WHO International Consortium in Psychiatric Epidemiology. *Bull World Health Organ*  
691 78, 413-26 (2000).
- 692 11. Chevalier A and Feinstein L. Sheepskin or Prozac: The Causal Effect of Education on Mental  
693 Health. *SSRN Electronic Journal*, (2006).
- 694 12. Humphreys KL, LeMoult J, Wear JG, Piersiak HA, Lee A, and Gotlib IH. Child maltreatment and  
695 depression: A meta-analysis of studies using the Childhood Trauma Questionnaire. *Child Abuse &*  
696 *Neglect* 102, 104361 (2020).
- 697 13. Li M, D'Arcy C, and Meng X. Maltreatment in childhood substantially increases the risk of adult  
698 depression and anxiety in prospective cohort studies: systematic review, meta-analysis, and  
699 proportional attributable fractions. *Psychological Medicine* 46, 717-730 (2016).
- 700 14. McLaughlin KA, Alvarez K, Fillbrunn M, et al. Racial/ethnic variation in trauma-related  
701 psychopathology in the United States: a population-based study. *Psychological Medicine* 49,  
702 2215-2226 (2019).
- 703 15. Gillespie CF, Bradley B, Mercer K, et al. Trauma exposure and stress-related disorders in inner city  
704 primary care patients. *General Hospital Psychiatry* 31, 505-514 (2009).
- 705 16. Holbrook TL, Hoyt DB, Stein MB, and Sieber WJ. Gender Differences in Long-Term Posttraumatic  
706 Stress Disorder Outcomes after Major Trauma: Women Are At Higher Risk of Adverse Outcomes  
707 than Men. *The Journal of Trauma: Injury, Infection, and Critical Care* 53, 882-888 (2002).
- 708 17. Seedat S, Scott KM, Angermeyer MC, et al. Cross-National Associations Between Gender and  
709 Mental Disorders in the World Health Organization World Mental Health Surveys. *Archives of*  
710 *General Psychiatry* 66, 785 (2009).
- 711 18. Golub Y, Kaltwasser SF, Mauch CP, et al. Reduced hippocampus volume in the mouse model of  
712 Posttraumatic Stress Disorder. *Journal of Psychiatric Research* 45, 650-659 (2011).
- 713 19. Rosenkranz JA, Venheim ER, and Padival M. Chronic Stress Causes Amygdala Hyperexcitability  
714 in Rodents. *Biological Psychiatry* 67, 1128-1136 (2010).
- 715 20. Pagliaccio D, Luby JL, Bogdan R, et al. Stress-System Genes and Life Stress Predict Cortisol  
716 Levels and Amygdala and Hippocampal Volumes in Children. *Neuropsychopharmacology* 39,  
717 1245-1253 (2014).
- 718 21. Hanson JL, Nacewicz BM, Sutterer MJ, et al. Behavioral Problems After Early Life Stress:  
719 Contributions of the Hippocampus and Amygdala. *Biological Psychiatry* 77, 314-323 (2015).



- 720 22. Swartz Johnna R, Knodt Annchen R, Radtke Spenser R, and Hariri Ahmad R. A Neural Biomarker  
721 of Psychological Vulnerability to Future Life Stress. *Neuron* 85, 505-511 (2015).
- 722 23. Teicher MH, Samson JA, Anderson CM, and Ohashi K. The effects of childhood maltreatment on  
723 brain structure, function and connectivity. *Nature Reviews Neuroscience* 17, 652-666 (2016).
- 724 24. Cassiers LLM, Sabbe BGC, Schmaal L, Veltman DJ, Penninx BWJH, and Van Den Eede F.  
725 Structural and Functional Brain Abnormalities Associated With Exposure to Different Childhood  
726 Trauma Subtypes: A Systematic Review of Neuroimaging Findings. *Frontiers in Psychiatry* 9, 329  
727 (2018).
- 728 25. Kovner R, Oler JA, and Kalin NH. Cortico-Limbic Interactions Mediate Adaptive and Maladaptive  
729 Responses Relevant to Psychopathology. *American Journal of Psychiatry* 176, 987-999 (2019).
- 730 26. Gilbert SJ, Spengler S, Simons JS, et al. Functional Specialization within Rostral Prefrontal Cortex  
731 (Area 10): A Meta-analysis. *Journal of Cognitive Neuroscience* 18, 932-948 (2006).
- 732 27. Tsujimoto S, Genovesio A, and Wise SP. Frontal pole cortex: encoding ends at the end of the  
733 endbrain. *Trends in Cognitive Sciences* 15, 169-176 (2011).
- 734 28. Stevens FL, Hurley RA, and Taber KH. Anterior Cingulate Cortex: Unique Role in Cognition and  
735 Emotion. *The Journal of Neuropsychiatry and Clinical Neurosciences* 23, 121-125 (2011).
- 736 29. Bechara A. Emotion, Decision Making and the Orbitofrontal Cortex. *Cerebral Cortex* 10, 295-307  
737 (2000).
- 738 30. Walter KH, Palmieri PA, and Gunstad J. More than symptom reduction: Changes in executive  
739 function over the course of PTSD treatment. *Journal of Traumatic Stress*, n/a-n/a (2010).
- 740 31. Misiak B, Beszlej JA, Kotowicz K, et al. Cytokine alterations and cognitive impairment in major  
741 depressive disorder: From putative mechanisms to novel treatment targets. *Progress in Neuro-*  
742 *Psychopharmacology and Biological Psychiatry* 80, 177-188 (2018).
- 743 32. Marganska A, Gallagher M, and Miranda R. Adult attachment, emotion dysregulation, and  
744 symptoms of depression and generalized anxiety disorder. *American Journal of Orthopsychiatry*  
745 83, 131-141 (2013).
- 746 33. Green MF. Cognitive Impairment and Functional Outcome in Schizophrenia and Bipolar Disorder.  
747 *The Journal of Clinical Psychiatry* 67, e12 (2006).
- 748 34. Glahn DC, Thompson PM, and Blangero J. Neuroimaging endophenotypes: Strategies for finding  
749 genes influencing brain structure and function. *Human Brain Mapping* 28, 488-501 (2007).
- 750 35. Hasler G and Northoff G. Discovering imaging endophenotypes for major depression. *Molecular*  
751 *Psychiatry* 16, 604-619 (2011).
- 752 36. Matsubara T, Matsuo K, Harada K, et al. Distinct and Shared Endophenotypes of Neural Substrates  
753 in Bipolar and Major Depressive Disorders. *PLOS ONE* 11, e0168493 (2016).
- 754 37. Doom JR and Gunnar MR. Stress physiology and developmental psychopathology: Past, present,  
755 and future. *Development and Psychopathology* 25, 1359-1373 (2013).
- 756 38. O'Connor TG, Moynihan JA, and Caserta MT. Annual Research Review: The neuroinflammation  
757 hypothesis for stress and psychopathology in children - developmental psychoneuroimmunology.  
758 *Journal of Child Psychology and Psychiatry* 55, 615-631 (2014).
- 759 39. Dirven BCJ, Homberg JR, Kozicz T, and Henckens MJAG. Epigenetic programming of the  
760 neuroendocrine stress response by adult life stress. *Journal of Molecular Endocrinology* 59, R11-  
761 R31 (2017).
- 762 40. Jensen SKG, Berens AE, and Nelson CA. Effects of poverty on interacting biological systems  
763 underlying child development. *The Lancet Child & Adolescent Health* 1, 225-239 (2017).
- 764 41. Clayton DF, Anreiter I, Aristizabal M, Frankland PW, Binder EB, and Citri A. The role of the genome  
765 in experience-dependent plasticity: Extending the analogy of the genomic action potential.  
766 *Proceedings of the National Academy of Sciences* 117, 23252-23260 (2020).
- 767 42. Klengel T, Mehta D, Anacker C, et al. Allele-specific FKBP5 DNA demethylation mediates gene-  
768 childhood trauma interactions. *Nature Neuroscience* 16, 33-41 (2013).
- 769 43. Weaver ICG, *Integrating Early Life Experience, Gene Expression, Brain Development, and*  
770 *Emergent Phenotypes*, in *Advances in Genetics*. 2014, Elsevier. p. 277-307.
- 771 44. Perroud N, Paoloni-Giacobino A, Prada P, et al. Increased methylation of glucocorticoid receptor  
772 gene (NR3C1) in adults with a history of childhood maltreatment: a link with the severity and type  
773 of trauma. *Translational Psychiatry* 1, e59-e59 (2011).

- 774 45. Tyrka AR, Price LH, Marsit C, Walters OC, and Carpenter LL. Childhood Adversity and Epigenetic  
775 Modulation of the Leukocyte Glucocorticoid Receptor: Preliminary Findings in Healthy Adults. *PLoS*  
776 *ONE* 7, e30148 (2012).
- 777 46. Uddin M, Aiello AE, Wildman DE, et al. Epigenetic and immune function profiles associated with  
778 posttraumatic stress disorder. *Proceedings of the National Academy of Sciences* 107, 9470-9475  
779 (2010).
- 780 47. Smith AK, Conneely KN, Kilaru V, et al. Differential immune system DNA methylation and cytokine  
781 regulation in post-traumatic stress disorder. *American Journal of Medical Genetics Part B:*  
782 *Neuropsychiatric Genetics* 156, 700-708 (2011).
- 783 48. Davies MN, Volta M, Pidsley R, et al. Functional annotation of the human brain methylome identifies  
784 tissue-specific epigenetic variation across brain and blood. *Genome Biology* 13, R43 (2012).
- 785 49. Hannon E, Lunnon K, Schalkwyk L, and Mill J. Interindividual methylomic variation across blood,  
786 cortex, and cerebellum: implications for epigenetic studies of neurological and neuropsychiatric  
787 phenotypes. *Epigenetics* 10, 1024-1032 (2015).
- 788 50. Yamamoto T, Toki S, Siegle GJ, et al. Increased amygdala reactivity following early life stress: a  
789 potential resilience enhancer role. *BMC Psychiatry* 17, 27 (2017).
- 790 51. Illingworth RS, Gruenewald-Schneider U, De Sousa D, et al. Inter-individual variability contrasts  
791 with regional homogeneity in the human brain DNA methylome. *Nucleic Acids Research* 43, 732-  
792 744 (2015).
- 793 52. Klengel T and Binder Elisabeth B. Epigenetics of Stress-Related Psychiatric Disorders and Gene  
794 × Environment Interactions. *Neuron* 86, 1343-1357 (2015).
- 795 53. Heim CM, Entringer S, and Buss C. Translating basic research knowledge on the biological  
796 embedding of early-life stress into novel approaches for the developmental programming of lifelong  
797 health. *Psychoneuroendocrinology* 105, 123-137 (2019).
- 798 54. Miller GE, Chen E, and Parker KJ. Psychological stress in childhood and susceptibility to the  
799 chronic diseases of aging: Moving toward a model of behavioral and biological mechanisms.  
800 *Psychological Bulletin* 137, 959-997 (2011).
- 801 55. Booij L, Szyf M, Carballedo A, et al. DNA Methylation of the Serotonin Transporter Gene in  
802 Peripheral Cells and Stress-Related Changes in Hippocampal Volume: A Study in Depressed  
803 Patients and Healthy Controls. *PLOS ONE* 10, e0119061 (2015).
- 804 56. Frodl T, Szyf M, Carballedo A, et al. DNA methylation of the serotonin transporter gene ( *SLC6A4*  
805 ) is associated with brain function involved in processing emotional stimuli. *Journal of Psychiatry*  
806 *and Neuroscience* 40, 296-305 (2015).
- 807 57. Ismaylova E, Lévesque ML, Pomares FB, et al. Serotonin transporter promoter methylation in  
808 peripheral cells and neural responses to negative stimuli: A study of adolescent monozygotic twins.  
809 *Translational Psychiatry* 8, 147 (2018).
- 810 58. Vukojevic V, Kolassa I-T, Fastenrath M, et al. Epigenetic Modification of the Glucocorticoid  
811 Receptor Gene Is Linked to Traumatic Memory and Post-Traumatic Stress Disorder Risk in  
812 Genocide Survivors. *Journal of Neuroscience* 34, 10274-10284 (2014).
- 813 59. Schechter DS, Moser DA, Paoloni-Giacobino A, et al. Methylation of NR3C1 is related to maternal  
814 PTSD, parenting stress and maternal medial prefrontal cortical activity in response to child  
815 separation among mothers with histories of violence exposure. *Frontiers in Psychology* 6, (2015).
- 816 60. Tozzi L, Farrell C, Booij L, et al. Epigenetic Changes of FKBP5 as a Link Connecting Genetic and  
817 Environmental Risk Factors with Structural and Functional Brain Changes in Major Depression.  
818 *Neuropsychopharmacology* 43, 1138-1145 (2018).
- 819 61. Sadeh N, Wolf EJ, Logue MW, et al. EPIGENETIC VARIATION AT SKA2 PREDICTS SUICIDE  
820 PHENOTYPES AND INTERNALIZING PSYCHOPATHOLOGY: 2015 Donald F Klein Investigator  
821 Award Finalist: Epigenetic Variation at SKA2 Predicts Suicide Phenotypes. *Depression and Anxiety*  
822 33, 308-315 (2016).
- 823 62. Sadeh N, Spielberg JM, Logue MW, et al. SKA2 methylation is associated with decreased  
824 prefrontal cortical thickness and greater PTSD severity among trauma-exposed veterans.  
825 *Molecular Psychiatry* 21, 357-363 (2016).
- 826 63. Gluck RL, Hartzell GE, Dixon HD, et al. Trauma exposure and stress-related disorders in a large,  
827 urban, predominantly African-American, female sample. *Arch Womens Ment Health* 24, 893-901  
828 (2021).

- 829 64. Bernstein DP, Stein JA, Newcomb MD, et al. Development and validation of a brief screening  
830 version of the Childhood Trauma Questionnaire. *Child Abuse & Neglect* 27, 169-190 (2003).
- 831 65. Kilaru V, Iyer SV, Almlı LM, et al. Genome-wide gene-based analysis suggests an association  
832 between Neuroligin 1 (NLGN1) and post-traumatic stress disorder. *Translational Psychiatry* 6,  
833 e820-e820 (2016).
- 834 66. Dunn EC, Nishimi K, Powers A, and Bradley B. Is developmental timing of trauma exposure  
835 associated with depressive and post-traumatic stress disorder symptoms in adulthood? *Journal of*  
836 *Psychiatric Research* 84, 119-127 (2017).
- 837 67. Powers A, Ressler KJ, and Bradley RG. The protective role of friendship on the effects of childhood  
838 abuse and depression. *Depression and Anxiety* 26, 46-53 (2009).
- 839 68. Binder EB. Association of FKBP5 Polymorphisms and Childhood Abuse With Risk of Posttraumatic  
840 Stress Disorder Symptoms in Adults. *JAMA* 299, 1291 (2008).
- 841 69. Stevens JS, Jovanovic T, Fani N, et al. Disrupted amygdala-prefrontal functional connectivity in  
842 civilian women with posttraumatic stress disorder. *Journal of Psychiatric Research* 47, 1469-1478  
843 (2013).
- 844 70. Stevens JS, Kim YJ, Galatzer-Levy IR, et al. Amygdala Reactivity and Anterior Cingulate  
845 Habituation Predict Posttraumatic Stress Disorder Symptom Maintenance After Acute Civilian  
846 Trauma. *Biological Psychiatry* 81, 1023-1029 (2017).
- 847 71. Stevens JS, Reddy R, Kim YJ, et al. Episodic memory after trauma exposure: Medial temporal lobe  
848 function is positively related to re-experiencing and inversely related to negative affect symptoms.  
849 *Neuroimage Clin* 17, 650-658 (2018).
- 850 72. van Rooij SJ, Stevens JS, Ely TD, et al. Childhood Trauma and COMT Genotype Interact to  
851 Increase Hippocampal Activation in Resilient Individuals. *Front Psychiatry* 7, 156 (2016).
- 852 73. Wierenga LM, Langen M, Oranje B, and Durston S. Unique developmental trajectories of cortical  
853 thickness and surface area. *NeuroImage* 87, 120-126 (2014).
- 854 74. Panizzon MS, Fennema-Notestine C, Eyler LT, et al. Distinct Genetic Influences on Cortical  
855 Surface Area and Cortical Thickness. *Cerebral Cortex* 19, 2728-2735 (2009).
- 856 75. Ratanatharathorn A, Boks MP, Maihofer AX, et al. Epigenome-wide association of PTSD from  
857 heterogeneous cohorts with a common multi-site analysis pipeline. *American Journal of Medical*  
858 *Genetics Part B: Neuropsychiatric Genetics* 174, 619-630 (2017).
- 859 76. Team RC, *R: A language and environment for statistical computing*. 2019, R Foundation for  
860 Statistical Computing: Vienna, Austria.
- 861 77. Barfield RT, Kilaru V, Smith AK, and Conneely KN. CpGassoc: an R function for analysis of DNA  
862 methylation microarray data. *Bioinformatics* 28, 1280-1281 (2012).
- 863 78. McCartney DL, Walker RM, Morris SW, McIntosh AM, Porteous DJ, and Evans KL. Identification  
864 of polymorphic and off-target probe binding sites on the Illumina Infinium MethylationEPIC  
865 BeadChip. *Genomics Data* 9, 22-24 (2016).
- 866 79. Teschendorff AE, Marabita F, Lechner M, et al. A beta-mixture quantile normalization method for  
867 correcting probe design bias in Illumina Infinium 450 k DNA methylation data. *Bioinformatics* 29,  
868 189-196 (2013).
- 869 80. Pidsley R, Y Wong CC, Volta M, Lunnon K, Mill J, and Schalkwyk LC. A data-driven approach to  
870 preprocessing Illumina 450K methylation array data. *BMC Genomics* 14, 293 (2013).
- 871 81. Du P, Zhang X, Huang C-C, et al. Comparison of Beta-value and M-value methods for quantifying  
872 methylation levels by microarray analysis. *BMC Bioinformatics* 11, 587 (2010).
- 873 82. Braun PR, Han S, Hing B, et al. Genome-wide DNA methylation comparison between live human  
874 brain and peripheral tissues within individuals. *Translational Psychiatry* 9, 47 (2019).
- 875 83. Barcelona V, Huang Y, Brown K, et al. Novel DNA methylation sites associated with cigarette  
876 smoking among African Americans. *Epigenetics* 14, 383-391 (2019).
- 877 84. Houseman EA, Accomando WP, Koestler DC, et al. DNA methylation arrays as surrogate  
878 measures of cell mixture distribution. *BMC Bioinformatics* 13, 86 (2012).
- 879 85. Purcell S, Neale B, Todd-Brown K, et al. PLINK: A Tool Set for Whole-Genome Association and  
880 Population-Based Linkage Analyses. *The American Journal of Human Genetics* 81, 559-575  
881 (2007).
- 882 86. Meyers JL, Salling MC, Almlı LM, et al. Frequency of alcohol consumption in humans; the role of  
883 metabotropic glutamate receptors and downstream signaling pathways. *Translational Psychiatry*  
884 5, e586-e586 (2015).

- 885 87. Joehanes R, Just AC, Marioni RE, et al. Epigenetic Signatures of Cigarette Smoking. *Circulation: Cardiovascular Genetics* 9, 436-447 (2016).
- 886
- 887 88. Group tTSBS, Logue MW, Miller MW, et al. An epigenome-wide association study of posttraumatic stress disorder in US veterans implicates several new DNA methylation loci. *Clinical Epigenetics* 12, 46 (2020).
- 888
- 889
- 890 89. Langfelder P and Horvath S. WGCNA: an R package for weighted correlation network analysis. *BMC Bioinformatics* 9, 559 (2008).
- 891
- 892 90. Lin X, Barton S, and Holbrook JD. How to make DNA methylome wide association studies more powerful. *Epigenomics* 8, 1117-1129 (2016).
- 893
- 894 91. Katrinli S, Stevens J, Wani AH, et al. Evaluating the impact of trauma and PTSD on epigenetic prediction of lifespan and neural integrity. *Neuropsychopharmacology* 45, 1609-1616 (2020).
- 895
- 896 92. Luby J, Belden A, Botteron K, et al. The Effects of Poverty on Childhood Brain Development: The Mediating Effect of Caregiving and Stressful Life Events. *JAMA Pediatrics* 167, 1135 (2013).
- 897
- 898 93. Barfield R, Shen J, Just AC, et al. Testing for the indirect effect under the null for genome-wide mediation analyses. *Genetic Epidemiology* 41, 824-833 (2017).
- 899
- 900 94. Ren X and Kuan PF. methylGSA: a Bioconductor package and Shiny app for DNA methylation data length bias adjustment in gene set testing. *Bioinformatics* 35, 1958-1959 (2019).
- 901
- 902 95. Supek F, Bošnjak M, Škunca N, and Šmuc T. REVIGO Summarizes and Visualizes Long Lists of Gene Ontology Terms. *PLoS ONE* 6, e21800 (2011).
- 903
- 904 96. Segerstrom SC and Miller GE. Psychological Stress and the Human Immune System: A Meta-Analytic Study of 30 Years of Inquiry. *Psychological Bulletin* 130, 601-630 (2004).
- 905
- 906 97. Anisman H. Cascading effects of stressors and inflammatory immune system activation: implications for major depressive disorder. *J Psychiatry Neurosci* 34, 4-20 (2009).
- 907
- 908 98. Nusslock R and Miller GE. Early-Life Adversity and Physical and Emotional Health Across the Lifespan: A Neuroimmune Network Hypothesis. *Biological Psychiatry* 80, 23-32 (2016).
- 909
- 910 99. Eckart C, Stoppel C, Kaufmann J, et al. Structural alterations in lateral prefrontal, parietal and posterior midline regions of men with chronic posttraumatic stress disorder. *Journal of Psychiatry and Neuroscience* 36, 176-186 (2011).
- 911
- 912
- 913 100. Legge RM, Sendi S, Cole JH, et al. Modulatory effects of brain-derived neurotrophic factor Val66Met polymorphism on prefrontal regions in major depressive disorder. *British Journal of Psychiatry* 206, 379-384 (2015).
- 914
- 915
- 916 101. Pappmeyer M, Giles S, Sussmann JE, et al. Cortical Thickness in Individuals at High Familial Risk of Mood Disorders as They Develop Major Depressive Disorder. *Biological Psychiatry* 78, 58-66 (2015).
- 917
- 918
- 919 102. Butterworth P, Cherbuin N, Sachdev P, and Anstey KJ. The association between financial hardship and amygdala and hippocampal volumes: results from the PATH through life project. *Social Cognitive and Affective Neuroscience* 7, 548-556 (2012).
- 920
- 921
- 922 103. Brito NH and Noble KG. Socioeconomic status and structural brain development. *Frontiers in Neuroscience* 8, (2014).
- 923
- 924 104. Sipahi L, Wildman DE, Aiello AE, et al. Longitudinal epigenetic variation of DNA methyltransferase genes is associated with vulnerability to post-traumatic stress disorder. *Psychological Medicine* 44, 3165-3179 (2014).
- 925
- 926
- 927 105. Lewis C. *Major Depressive Disorder Working Group of the Psychiatric Genomics Consortium*. 2020; Available from: <https://www.med.unc.edu/pgc/pgc-workgroups/major-depressive-disorder/>.
- 928
- 929 106. Feng J, Zhou Y, Campbell SL, et al. Dnmt1 and Dnmt3a maintain DNA methylation and regulate synaptic function in adult forebrain neurons. *Nature Neuroscience* 13, 423-430 (2010).
- 930
- 931 107. LaPlant Q, Vialou V, Covington HE, et al. Dnmt3a regulates emotional behavior and spine plasticity in the nucleus accumbens. *Nature Neuroscience* 13, 1137-1143 (2010).
- 932
- 933 108. Xu S, Sui J, Yang S, Liu Y, Wang Y, and Liang G. Integrative analysis of competing endogenous RNA network focusing on long noncoding RNA associated with progression of cutaneous melanoma. *Cancer Medicine* 7, 1019-1029 (2018).
- 934
- 935
- 936 109. Li H, Jia Y, Cheng J, Liu G, and Song F. LncRNA NCK1-AS1 promotes proliferation and induces cell cycle progression by crosstalk NCK1-AS1/miR-6857/CDK1 pathway. *Cell Death & Disease* 9, 198 (2018).
- 937
- 938
- 939 110. Mirza AH, Berthelsen CH, Seemann SE, et al. Transcriptomic landscape of lncRNAs in inflammatory bowel disease. *Genome Medicine* 7, 39 (2015).
- 940

941 111. Taudien S, Galgoczy P, Huse K, et al. Polymorphic segmental duplications at 8p23.1 challenge the  
942 determination of individual defensin gene repertoires and the assembly of a contiguous human  
943 reference sequence. *BMC Genomics* 5, 92 (2004).

944 112. Huang Y and Chen Z. Inflammatory bowel disease related innate immunity and adaptive immunity.  
945 *Am J Transl Res* 8, 2490-7 (2016).

946 113. Danese A, Caspi A, Williams B, et al. Biological embedding of stress through inflammation  
947 processes in childhood. *Molecular Psychiatry* 16, 244-246 (2011).

948 114. Baumeister D, Akhtar R, Ciufolini S, Pariante CM, and Mondelli V. Childhood trauma and adulthood  
949 inflammation: a meta-analysis of peripheral C-reactive protein, interleukin-6 and tumour necrosis  
950 factor- $\alpha$ . *Molecular Psychiatry* 21, 642-649 (2016).

951 115. Danese A, Pariante CM, Caspi A, Taylor A, and Poulton R. Childhood maltreatment predicts adult  
952 inflammation in a life-course study. *Proceedings of the National Academy of Sciences* 104, 1319-  
953 1324 (2007).

954 116. Patel N, Crider A, Pandya CD, Ahmed AO, and Pillai A. Altered mRNA Levels of Glucocorticoid  
955 Receptor, Mineralocorticoid Receptor, and Co-Chaperones (FKBP5 and PTGES3) in the Middle  
956 Frontal Gyrus of Autism Spectrum Disorder Subjects. *Molecular Neurobiology* 53, 2090-2099  
957 (2016).

958 117. Sinclair D, Tsai SY, Woon HG, and Weickert CS. Abnormal Glucocorticoid Receptor mRNA and  
959 Protein Isoform Expression in the Prefrontal Cortex in Psychiatric Illness.  
960 *Neuropsychopharmacology* 36, 2698-2709 (2011).

961 118. Sinclair D, Fillman SG, Webster MJ, and Weickert CS. Dysregulation of glucocorticoid receptor co-  
962 factors FKBP5, BAG1 and PTGES3 in prefrontal cortex in psychotic illness. *Scientific Reports* 3,  
963 3539 (2013).

964 119. Meier TB, Drevets WC, Wurfel BE, et al. Relationship between neurotoxic kynurenine metabolites  
965 and reductions in right medial prefrontal cortical thickness in major depressive disorder. *Brain,  
966 Behavior, and Immunity* 53, 39-48 (2016).

967 120. Gresset A, Sondek J, and Harden TK, *The Phospholipase C Isozymes and Their Regulation*, in  
968 *Phosphoinositides I: Enzymes of Synthesis and Degradation*, Balla T, Wymann M, and York JD,  
969 Editors. 2012, Springer Netherlands: Dordrecht. p. 61-94.

970 121. Hu X-T, Zhang F-B, Fan Y-C, et al. Phospholipase C delta 1 is a novel 3p22.3 tumor suppressor  
971 involved in cytoskeleton organization, with its epigenetic silencing correlated with high-stage gastric  
972 cancer. *Oncogene* 28, 2466-2475 (2009).

973 122. Ichinohe M, Nakamura Y, Sai K, Nakahara M, Yamaguchi H, and Fukami K. Lack of phospholipase  
974 C- $\delta$ 1 induces skin inflammation. *Biochemical and Biophysical Research Communications* 356,  
975 912-918 (2007).

976 123. Stallings JD, Tall EG, Pentylala S, and Rebecchi MJ. Nuclear Translocation of Phospholipase C- $\delta$ 1  
977 Is Linked to the Cell Cycle and Nuclear Phosphatidylinositol 4,5-Bisphosphate. *Journal of Biological  
978 Chemistry* 280, 22060-22069 (2005).

979 124. Yu H, Fukami K, Watanabe Y, Ozaki C, and Takenawa T. Phosphatidylinositol 4,5-bisphosphate  
980 reverses the inhibition of RNA transcription caused by histone H1. *European Journal of  
981 Biochemistry* 251, 281-287 (1998).

982 125. Haddad JJ, Saadé NE, and Safieh-Garabedian B. Cytokines and neuro-immune-endocrine  
983 interactions: a role for the hypothalamic-pituitary-adrenal revolving axis. *Journal of  
984 Neuroimmunology* 133, 1-19 (2002).

985 126. Sternberg EM. Neural regulation of innate immunity: a coordinated nonspecific host response to  
986 pathogens. *Nature Reviews Immunology* 6, 318-328 (2006).

987 127. Vilsaint CL, NeMoyer A, Fillbrunn M, et al. Racial/ethnic differences in 12-month prevalence and  
988 persistence of mood, anxiety, and substance use disorders: Variation by nativity and  
989 socioeconomic status. *Comprehensive Psychiatry* 89, 52-60 (2019).

990



**Table 1. Demographic & psychosocial measure summary statistics (non-scaled) for the current sample (n = 97)**

| <b>Measure</b>                             | <b>Description</b>       | <b>Value</b>          |
|--------------------------------------------|--------------------------|-----------------------|
| Age                                        | Mean [SD] (Range)        | 40 [12.5] (19 - 62)   |
| Sex                                        | Female                   | 100%                  |
| Self-reported race/ethnicity               | African American         | 100%                  |
| Household income (income)                  | \$0-499                  | 30%                   |
|                                            | \$499-999                | 36%                   |
|                                            | \$1000+                  | 34%                   |
| Educational attainment (education)         | Some high school         | 15%                   |
|                                            | High school grad or GED  | 30%                   |
|                                            | ≥ Undergraduate degree   | 55%                   |
| Employment/disability                      | Employed                 | 33%                   |
|                                            | Disabled (not employed)  | 7%                    |
|                                            | Not employed or disabled | 60%                   |
| Childhood trauma questionnaire (CTQ total) | Mean [SD] (Range)        | 40.5 [15.4] (25 - 93) |
| Traumatic events inventory (TEI)           | Mean [SD] (Range)        | 4.2 [2.3] (0 - 10.7)  |

Legend: [standard deviation], (range).

**Table 2. Adverse social exposures (ASEs) predict hemisphere-mean fronto-limbic brain morphometry**

|                      | Low household income |       |        |        | Low educational attainment |       |        |         | Childhood trauma burden |       |        |        | Adult trauma burden |       |        |       |
|----------------------|----------------------|-------|--------|--------|----------------------------|-------|--------|---------|-------------------------|-------|--------|--------|---------------------|-------|--------|-------|
|                      | $\beta$              | SE    | T      | P      | $\beta$                    | SE    | T      | P       | $\beta$                 | SE    | T      | P      | $\beta$             | SE    | T      | P     |
| Hipp. Volume (mm3)   | -0.425               | 0.267 | -1.590 | 0.116  | 0.005                      | 0.279 | 0.019  | 0.985   | 0.030                   | 0.115 | 0.260  | 0.796  | -0.167              | 0.101 | -1.644 | 0.104 |
| Amyg. Volume (mm3)   | -0.649               | 0.283 | -2.299 | 0.024* | 0.091                      | 0.294 | 0.310  | 0.757   | 0.145                   | 0.118 | 1.228  | 0.223  | -0.146              | 0.106 | -1.380 | 0.171 |
| FP SA (mm2)          | 0.556                | 0.285 | 1.950  | 0.055  | -0.065                     | 0.294 | -0.221 | 0.826   | -0.004                  | 0.114 | -0.037 | 0.971  | 0.109               | 0.107 | 1.017  | 0.312 |
| Medial OFC SA (mm2)  | 0.271                | 0.293 | 0.926  | 0.357  | -0.374                     | 0.302 | -1.237 | 0.220   | -0.052                  | 0.117 | -0.440 | 0.661  | -0.112              | 0.110 | -1.021 | 0.310 |
| Lateral OFC SA (mm2) | -0.033               | 0.298 | -0.111 | 0.912  | -0.244                     | 0.307 | -0.796 | 0.428   | -0.211                  | 0.119 | -1.769 | 0.081  | -0.093              | 0.111 | -0.834 | 0.407 |
| SFG SA (mm2)         | 0.386                | 0.289 | 1.336  | 0.185  | -0.435                     | 0.298 | -1.460 | 0.148   | -0.223                  | 0.116 | -1.926 | 0.058  | 0.039               | 0.108 | 0.358  | 0.721 |
| RMFG SA (mm2)        | -0.050               | 0.278 | -0.181 | 0.857  | -0.543                     | 0.286 | -1.897 | 0.061   | -0.231                  | 0.111 | -2.079 | 0.041* | 0.036               | 0.104 | 0.346  | 0.730 |
| Rostral ACC SA (mm2) | -0.176               | 0.291 | -0.602 | 0.549  | -0.511                     | 0.301 | -1.700 | 0.093   | -0.229                  | 0.117 | -1.961 | 0.053  | 0.029               | 0.109 | 0.268  | 0.790 |
| Caudal ACC SA (mm2)  | 0.121                | 0.272 | 0.443  | 0.659  | -0.855                     | 0.280 | -3.049 | 0.003** | -0.110                  | 0.109 | -1.006 | 0.317  | 0.044               | 0.102 | 0.436  | 0.664 |
| FP CT (mm)           | -0.137               | 0.293 | -0.468 | 0.641  | 0.684                      | 0.302 | 2.267  | 0.026*  | -0.079                  | 0.117 | -0.671 | 0.504  | -0.120              | 0.110 | -1.098 | 0.275 |
| Medial OFC CT (mm)   | -0.002               | 0.293 | -0.008 | 0.993  | 0.346                      | 0.315 | 1.099  | 0.275   | 0.138                   | 0.118 | 1.172  | 0.244  | 0.022               | 0.111 | 0.202  | 0.840 |
| Lateral OFC CT (mm)  | -0.023               | 0.304 | -0.074 | 0.941  | 0.241                      | 0.314 | 0.769  | 0.444   | 0.055                   | 0.122 | 0.451  | 0.653  | -0.112              | 0.114 | -0.983 | 0.328 |
| SFG CT (mm)          | -0.088               | 0.248 | -0.356 | 0.723  | 0.553                      | 0.256 | 2.162  | 0.034*  | 0.070                   | 0.100 | 0.699  | 0.487  | -0.170              | 0.093 | -1.831 | 0.071 |
| RMFG CT (mm)         | -0.078               | 0.281 | -0.276 | 0.783  | 0.443                      | 0.290 | 1.530  | 0.130   | 0.072                   | 0.113 | 0.637  | 0.526  | -0.112              | 0.105 | -1.062 | 0.291 |
| Rostral ACC CT (mm)  | -0.063               | 0.297 | -0.211 | 0.833  | 0.060                      | 0.318 | 0.188  | 0.851   | 0.019                   | 0.118 | 0.163  | 0.871  | -0.034              | 0.112 | -0.305 | 0.761 |
| Caudal ACC CT (mm)   | -0.124               | 0.296 | -0.419 | 0.676  | 0.187                      | 0.318 | 0.589  | 0.558   | 0.046                   | 0.119 | 0.388  | 0.699  | 0.004               | 0.112 | 0.039  | 0.969 |

\*\*\* P < 0.001, \*\*P < 0.01, \* P < 0.05, **P: BH significant (bold)**

Both dependent and independent variables were scaled prior to analysis. Childhood trauma burden was measured with the Childhood Trauma Questionnaire, and adult trauma burden was measured with the Traumatic Events Inventory. In separate linear models including hippocampus and amygdala volumes as dependent variables, income, education, CTQ total, and TEI were included as independent variables of interest, whereas genomic ancestry, age, employment/disability and ICV were included as covariates. The same independent variables and covariates were included, minus ICV, to predict frontal cortex subregions SA and CT measures.

Abbreviations. Hipp: hippocampus, Amyg: amygdala, FP: frontal pole, mOFC: medial orbito-frontal cortex, lOFC: lateral orbito-frontal cortex, SFG: superior frontal gyrus, RMFG: rostral medial frontal gyrus, rACC: rostral anterior cingulate cortex, cACC: caudal anterior cingulate cortex, SA: surface area, CT: cortical thickness,  $\beta$ : scaled beta value, SE: standard error, T: t statistic value.



**Table 3. Module eigengenes (MEs) mediating observed adverse social exposure (ASE), fronto-limbic brain morphometry relationships**

| <u>Maroon: Rostral Mid Frontal Gyrus SA</u> | <u><math>\beta</math></u> | <u>95% CI Lower</u> | <u>95% CI Upper</u> |
|---------------------------------------------|---------------------------|---------------------|---------------------|
| Average indirect effect (IDE)               | <b>-0.466**</b>           | -0.952              | -0.098              |
| Average direct effect (DE)                  | -0.517                    | -1.464              | 0.407               |
| Average total effect (TE)                   | -0.983*                   | -1.959              | -0.016              |
| <u>Tan: Rostral Mid Frontal Gyrus SA</u>    | <u><math>\beta</math></u> | <u>95% CI Lower</u> | <u>95% CI Upper</u> |
| Average indirect effect (IDE)               | -0.124                    | -0.448              | 0.100               |
| Average direct effect (DE)                  | -0.884                    | -1.869              | 0.085               |
| Average total effect (TE)                   | -1.001*                   | -1.955              | -0.040              |
| <u>White: Rostral Mid Frontal Gyrus SA</u>  | <u><math>\beta</math></u> | <u>95% CI Lower</u> | <u>95% CI Upper</u> |
| Average indirect effect (IDE)               | <b>-0.348*</b>            | -0.781              | -0.026              |
| Average direct effect (DE)                  | -0.667                    | -1.590              | 0.251               |
| Average total effect (TE)                   | -1.014*                   | -1.983              | -0.069              |
| <u>Yellow: Rostral Mid Frontal Gyrus SA</u> | <u><math>\beta</math></u> | <u>95% CI Lower</u> | <u>95% CI Upper</u> |
| Average indirect effect (IDE)               | -0.128                    | -0.474              | 0.142               |
| Average direct effect (DE)                  | -0.888                    | -1.908              | 0.148               |
| Average total effect (TE)                   | -1.016*                   | -2.003              | -0.019              |
| <u>Lightcoral: Caudal ACC SA</u>            | <u><math>\beta</math></u> | <u>95% CI Lower</u> | <u>95% CI Upper</u> |
| Average indirect effect (IDE)               | -0.107                    | -0.307              | 0.015               |
| Average direct effect (DE)                  | <b>-0.737*</b>            | -1.296              | -0.176              |
| Average total effect (TE)                   | -0.844**                  | -1.394              | -0.283              |

\*\*\* P < 0.001, \*\* P < 0.01, \* P < 0.05, **P: BH-significant (bolded)**

Both dependent and independent variables were scaled prior to analysis. SA: surface area (mm<sup>2</sup>), CT: cortical thickness (mm),  $\beta$ : coefficient estimate, CI: confidence interval

**Table 4. Probe-wise mediation analysis of the relationship between childhood trauma burden (CTQ total) & rostral middle frontal gyrus (RMFG) surface area (SA)**

| Probe name        | Module name   | Chr:pos (hg38) | Gene name         | IDE $\beta$   | IDE P          | DE $\beta$ | DE P  | TE $\beta$ | TE P   |
|-------------------|---------------|----------------|-------------------|---------------|----------------|------------|-------|------------|--------|
| <b>cg21622733</b> | <b>Maroon</b> | Chr19:35408551 | <i>LINC01531</i>  | <b>-0.512</b> | <b>0.003**</b> | -0.471     | 0.320 | -0.983     | 0.044* |
| <b>cg19805668</b> | <b>Maroon</b> | Chr14:74951972 | <i>PGF</i>        | <b>-0.411</b> | <b>0.009**</b> | -0.592     | 0.217 | -1.003     | 0.042* |
| cg10592766        | Maroon        | Chr19:50226846 | <i>MYH14</i>      | -0.321        | 0.019*         | -0.670     | 0.182 | -0.990     | 0.048* |
| cg03710029        | Maroon        | Chr17:81291801 | <i>SLC38A10</i>   | -0.383        | 0.025*         | -0.613     | 0.188 | -0.996     | 0.043* |
| cg15150970        | Maroon        | Chr2:25250660  | <i>DNMT3A</i>     | -0.253        | 0.049*         | -0.753     | 0.125 | -1.006     | 0.040* |
| cg12219789        | Maroon        | Chr17:7324180  | <i>NEURL4</i>     | -0.352        | 0.049*         | -0.622     | 0.183 | -0.974     | 0.049* |
| cg01544227        | White         | Chr12:8323720  | <i>AC092745.5</i> | -0.305        | 0.036*         | -0.689     | 0.175 | -0.994     | 0.044* |
| cg00686169        | White         | Chr8:8024026   | <i>FAM90A24P</i>  | -0.277        | 0.043*         | -0.740     | 0.126 | -1.017     | 0.037* |
| cg08002107        | White         | Chr8:12135255  | <i>USP17L7</i>    | -0.268        | 0.047*         | -0.738     | 0.122 | -1.006     | 0.040* |

\*\*\* P < 0.001, \*\*P < 0.01, \* P < 0.05, P: **BH-significant (bold)**

Both dependent and independent variables were scaled prior to analysis. IDE: indirect effect, DE: direct effect, TE: total effect,  $\beta$ : coefficient estimate, P: nominal p-value, BH: Benjamini-Hochberg



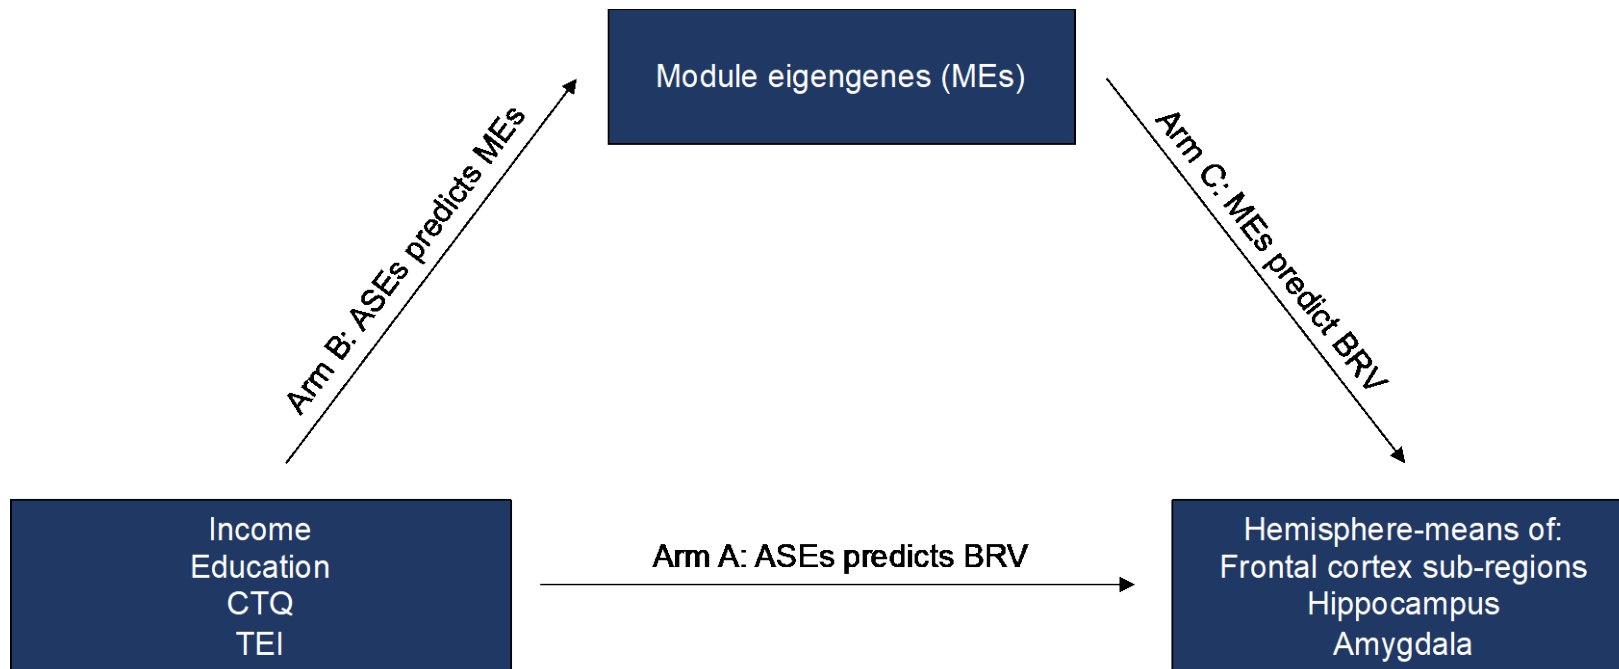

2  
3  
4  
5  
6  
7  
8  
9  
10  
11  
12  
13

**Figure 1.** Conceptual model testing individual module eigengenes (MEs) as mediators of the hypothesized associations between adverse social exposures (ASEs) and variability in fronto-limbic brain morphometries. Arm A. Analyses included hemisphere-mean hippocampus and amygdala volumes as dependent variables (in separate models). Income, education, CTQ total, and TEI were included as independent variables of interest, whereas genomic ancestry, age, employment/disability and ICV were included as covariates. The same predictors and covariates were included, minus ICV, to predict frontal cortex subregions SA and CT measures. Arm B. Analyses included 5mC MEs as dependent variables (in separate models). Income, education, CTQ total, and TEI were included as independent variables of interest, and employment/disability was included as a covariate. Arm C. Analyses included individual fronto-limbic morphometry measures as dependent variables (in separate models). Individual 5mC MEs were included as independent variables of interest, whereas age, genomic ancestry, employment, and ICV (ICV was only included in hippocampus and amygdala models) were included as covariates.

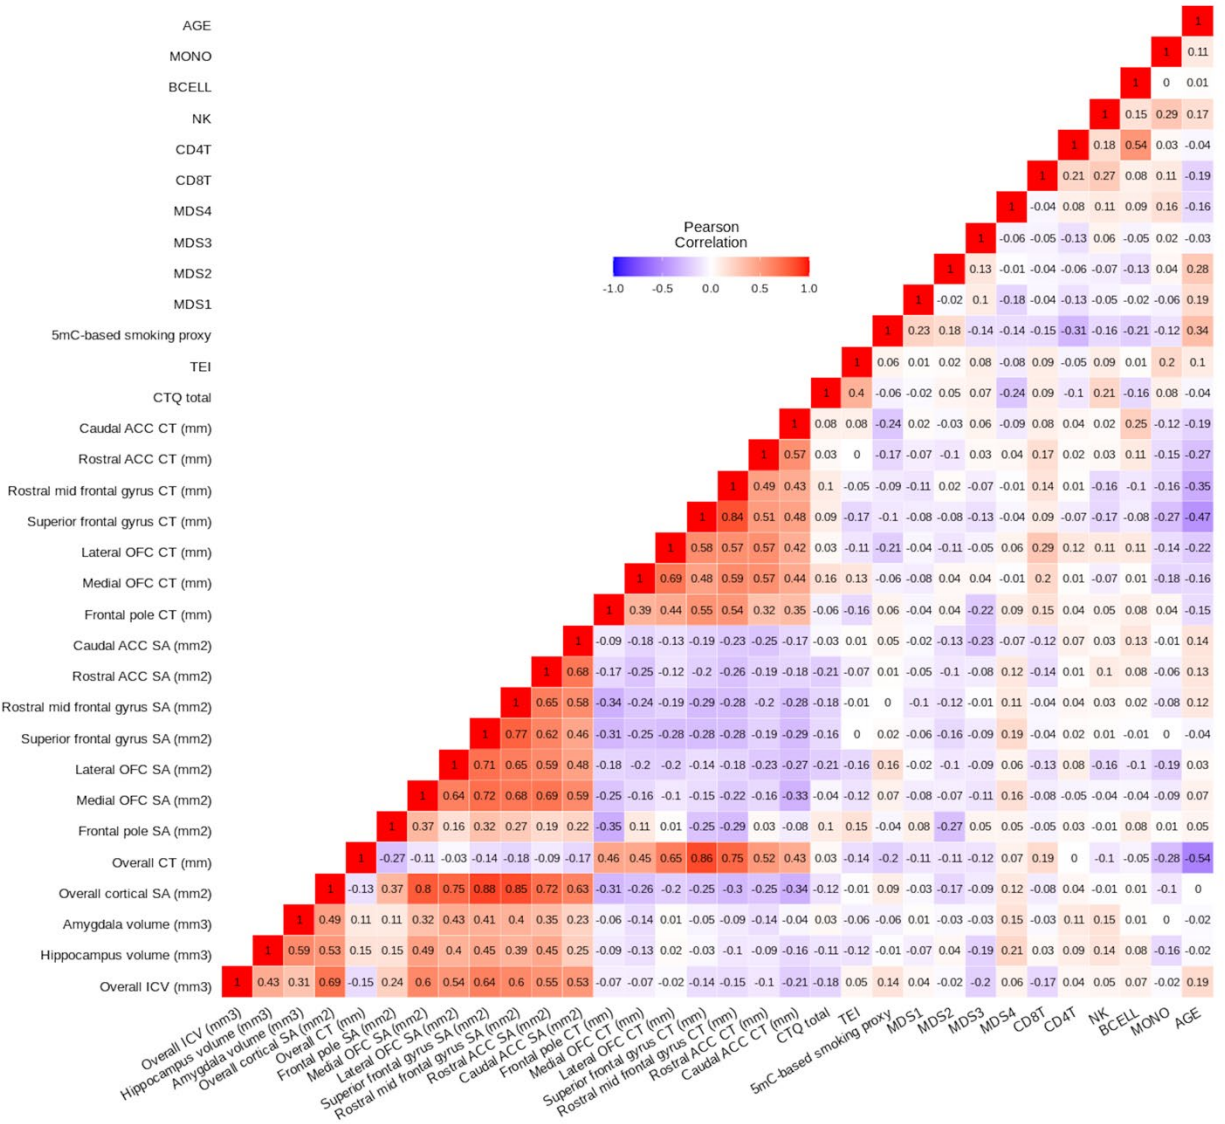

14

15 **Figure 2.** Pearson's correlation heatmap of variables used throughout the current study. Age is negatively  
 16 associated with multiple frontal cortex cortical thickness (CT) measures (Pearson's correlation  $r_{\text{range}} = -0.15$   
 17 to  $-0.47$ ,  $p_{\text{range}} = 0.092$  to  $6 \times 10^{-7}$ ). Within frontal cortex CT measures, multiple subregions show positive  
 18 correlations with one another (Pearson's correlation  $r_{\text{range}} = 0.32$  to  $0.84$ ,  $p_{\text{range}} = 0.004$  to  $< 2 \times 10^{-16}$ ). The  
 19 same phenomenon is observed within frontal cortex surface area (SA) measures (Pearson's correlation  
 20  $r_{\text{range}} = 0.16$  to  $0.77$ ,  $p_{\text{range}} = 0.210$  to  $< 2 \times 10^{-16}$ ). Overall CT is positively correlated with each of the frontal  
 21 cortex CT measures (Pearson's correlation  $r_{\text{range}} = 0.43$  to  $0.86$ ,  $p_{\text{range}} = 1 \times 10^{-7}$  to  $< 2 \times 10^{-16}$ ), and overall SA  
 22 is positively correlated with each of the frontal cortex SA measures (Pearson's correlation  $r_{\text{range}} = 0.37$  to  
 23  $0.88$ ,  $p_{\text{range}} = 5 \times 10^{-4}$  to  $< 2 \times 10^{-16}$ ).  
 24

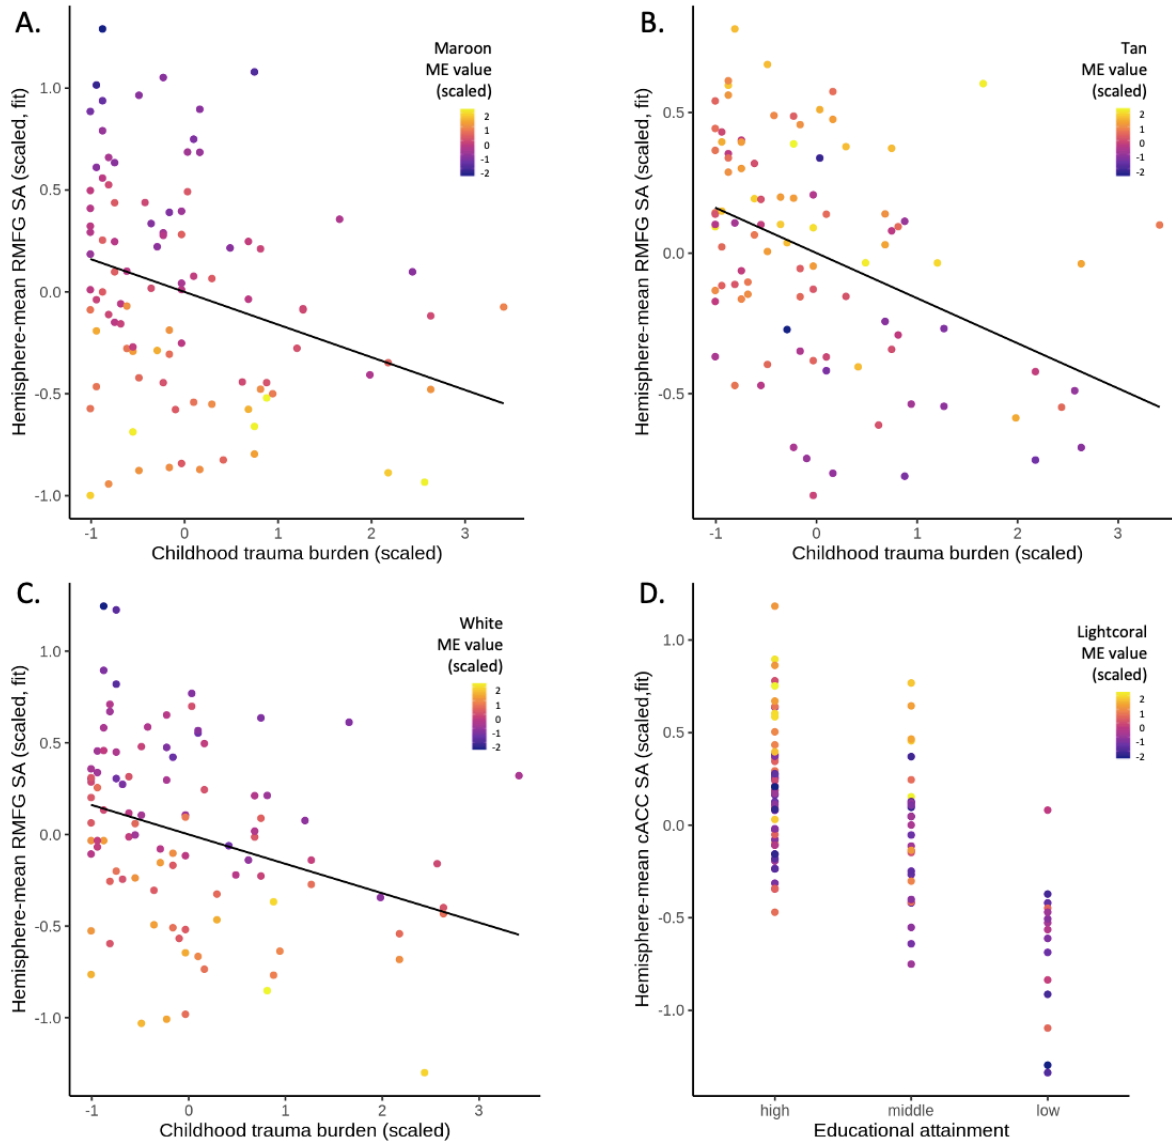

25

26

27 **Figure 3.** CTQ total is negatively associated with rostral middle frontal gyrus (RMFG) surface area (SA).  
 28 Low educational attainment status is associated with low caudal anterior cingulate cortex (cACC) SA. Out  
 29 of seven CTQ-associated module eigengenes (MEs), the three strongest relationships with hemisphere-  
 30 mean RMFG SA were the Maroon (A), White (B), and Tan (C) MEs. Out of two low education attainment-  
 31 associated MEs, the strongest relationship with hemisphere-mean cACC SA was the Lightcoral ME (D). As  
 32 shown, neuroimaging measures are adjusted by age, ME value, genomic ancestry, employment/disability  
 33 status, and an adverse social exposure (ASE). Dependent and independent variables were scaled. A. CTQ  
 34 total was positively associated with the Maroon ME ( $\beta = 0.289$ ,  $SE = 0.109$ ,  $t = 2.639$ ,  $p = 9.8 \times 10^{-3}$ ). In turn,  
 35 the Maroon ME was negatively associated with RMFG SA ( $\beta = -0.451$ ,  $SE = 0.091$ ,  $t = -4.966$ ,  $p = 3 \times 10^{-6}$ ).  
 36 B. CTQ total was negatively associated with the Tan ME ( $\beta = -0.248$ ,  $SE = 0.112$ ,  $t = -2.220$ ,  $p = 0.029$ ).  
 37 The Tan ME was, in turn, positively associated with RMFG SA ( $\beta = 0.233$ ,  $SE = 0.100$ ,  $t = 2.322$ ,  $p = 0.023$ ).  
 38 C. CTQ total was positively associated with the White ME ( $\beta = 0.236$ ,  $SE = 0.110$ ,  $t = 2.151$ ,  $p = 0.034$ ). In  
 39 turn, the White ME was negatively associated with RMFG SA ( $\beta = -0.392$ ,  $SE = 0.093$ ,  $t = -4.231$ ,  $p =$   
 40  $6 \times 10^{-5}$ ). D. Low educational attainment (no high school certificate) was associated with the Lightcoral ME  
 41 ( $\beta = -0.615$ ,  $SE = 0.296$ ,  $t = -2.079$ ,  $p = 0.040$ ). The Lightcoral ME, in turn, was positively associated with  
 42 cACC SA ( $\beta = 0.215$ ,  $SE = 0.099$ ,  $t = 2.182$ ,  $p = 0.032$ ).  
 43
